# Supplementary material
Source: PubMed Central journal article supplement (PMC3046371)

# Supporting Information

## Investigation of the Stereochemistry of Intermolecular Conjugate

### Additions of Nucleophiles to Acyclic Nitrosoalkenes

Jason A. Witek and Steven M. Weinreb\*

*Department of Chemistry, The Pennsylvania State University*

*University Park, Pennsylvania 16802, United States*

*E-Mail: [smw@chem.psu.edu](mailto:smw@chem.psu.edu)*

#### Table of Contents

|                                                                       |         |
|-----------------------------------------------------------------------|---------|
| Title Page                                                            | S1      |
| Experimental details of new compounds                                 | S2-S11  |
| Crystal structures of compounds <b>11</b> , <b>15</b> , and <b>19</b> | S12-S14 |
| NMR spectra of new compounds                                          | S15-S50 |

General. All non-aqueous reactions were carried out under a positive atmosphere of argon in flame-dried glassware unless otherwise noted. Anhydrous THF and CH<sub>2</sub>Cl<sub>2</sub> were obtained from a solvent dispensing system. All other solvents and reagents were used as obtained from commercial sources without further purification. <sup>1</sup>H and <sup>13</sup>C NMR spectra were recorded on 300, 360 or 400 MHz spectrometers. Flash column chromatography was performed using silica gel 60 (230-400 mesh).

**General Procedure for the Synthesis of  $\alpha$ -Chloro-*O*-silylaldoximes.** To a stirred solution of the aldehyde (1 mmol) in CHCl<sub>3</sub> at 0 °C was added a catalytic amount of proline (0.05 mmol) and NCS (1.2 mmol). The resulting solution was warmed to rt and stirred for 12 h. The reaction mixture was diluted with pentane, filtered and washed with water. The organic layer was dried over Na<sub>2</sub>SO<sub>4</sub> and concentrated *in vacuo*. The residue was purified by flash column chromatography on silica gel eluting with a mixture of ethyl acetate and hexanes to provide the  $\alpha$ -chloroaldehyde.

To a stirred solution of the  $\alpha$ -chloroaldehyde (1 mmol) in CH<sub>2</sub>Cl<sub>2</sub> (2 mL) and a spatula of 4 Å molecular sieves was added H<sub>2</sub>NOTBS (147 mg, 1 mmol) and PPTS (13 mg, 0.05 mmol). The reaction mixture was stirred at rt for 12 h and then filtered through a pad of Celite. The solution was concentrated *in vacuo* and the residue was purified by flash column chromatography on silica gel eluting with a mixture of ethyl acetate and hexanes to provide the  $\alpha$ -chloro-*O*-silylaldoxime.

**2-Chloro-3,5,5-trimethylhexanal.** The product was obtained as a clear oil (5.36 g) in 86% yield as an inseparable mixture of

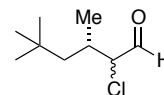

diastereomers in ~1:1 ratio: Isomer A: <sup>1</sup>H NMR (300 MHz, CDCl<sub>3</sub>)  $\delta$  9.52 (d, *J* = 2.4 Hz, 1H), 4.15 (dd, *J* = 4.4, 2.5 Hz, 1H), 2.35-2.26 (m, 1H), 1.54-1.51 (m, 2H), 1.18 (d, *J* =

11.9 Hz, 3H), 0.94 (s, 9H);  $^{13}\text{C}$  NMR (75 MHz,  $\text{CDCl}_3$ )  $\delta$  197.0, 71.8, 47.6, 33.3, 31.4, 30.2, 19.9; Isomer B:  $^1\text{H}$  NMR (300 MHz,  $\text{CDCl}_3$ )  $\delta$  9.52 (d,  $J = 2.9$  Hz, 1H), 4.06 (dd,  $J = 4.9, 2.9$  Hz, 1H), 2.26-2.23 (m, 1H), 1.50-1.46 (m, 2H), 1.03 (d,  $J = 12.7$  Hz, 3H), 0.94 (s, 9H);  $^{13}\text{C}$  NMR (75 MHz,  $\text{CDCl}_3$ )  $\delta$  196.6, 71.3, 46.5, 32.6, 31.3, 30.1, 18.3

**2-Chloro-3-phenylbutanal *O*-TBS-oxime (3).** The product was obtained as a clear oil (485 mg, 64% yield) as an inseparable mixture of isomers: Data for major isomer:  $^1\text{H}$  NMR (300 MHz,  $\text{CDCl}_3$ )  $\delta$  7.48 (d,  $J = 8.8$  Hz, 1H), 7.38-7.20 (m, 5H), 4.64 (dd,  $J = 16.2, 8.1$  Hz, 1H), 3.22 (m, 1H), 1.51 (d,  $J = 7.0$  Hz, 3H), 0.95 (s, 9H), 0.84 (s, 6H);  $^{13}\text{C}$  NMR (90 MHz,  $\text{CDCl}_3$ )  $\delta$  153.1, 141.6, 128.7, 128.0, 127.3, 63.0, 55.8, 45.6, 44.5, 26.0, 18.2; HRMS-ES+ ( $\text{C}_{16}\text{H}_{27}\text{NOSiCl}$ ) calcd 312.1550 ( $\text{MH}^+$ ), found 312.1550.

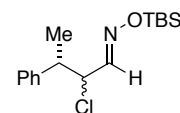

**2-Chloro-3-methoxy-3-phenylpropanal *O*-TBS-oxime (12).** The product was obtained as a clear oil (667 mg, 19% yield) as an inseparable ~1: 1 mixture of isomers: Isomer A:  $^1\text{H}$  NMR (360 MHz,  $\text{CDCl}_3$ )  $\delta$  7.59 (d,  $J = 8.6$  Hz, 1H), 7.41-7.34 (m, 5H), 4.68 (dd,  $J = 8.6, 6.6$  Hz, 1H), 4.45 (d,  $J = 6.6$  Hz, 1H), 3.38 (d,  $J = 6.5$  Hz, 3H), 0.84 (s, 9H), 0.13 (s, 6H);  $^{13}\text{C}$  NMR (90 MHz,  $\text{CDCl}_3$ )  $\delta$  151.4, 137.1, 128.5, 127.6, 127.4, 85.1, 60.8, 57.4, 54.0, 25.7, 18.2. Isomer B:  $^1\text{H}$  NMR (360 MHz,  $\text{CDCl}_3$ )  $\delta$  7.46 (d,  $J = 8.6$  Hz, 1H), 7.41-7.34 (m, 5H), 4.64 (dd,  $J = 8.6, 5.2$  Hz, 1H), 4.51 (d,  $J = 5.2$  Hz, 1H), 3.35 (d,  $J = 3.9$  Hz, 3H), 0.84 (s, 9H), 0.13 (s, 6H);  $^{13}\text{C}$  NMR (90 MHz,  $\text{CDCl}_3$ )  $\delta$  151.4, 136.9, 128.6, 127.6, 127.4, 85.7, 60.0, 57.6, 52.4, 26.0, 18.2; HRMS-ES+ ( $\text{C}_{16}\text{H}_{27}\text{NO}_2\text{ClSi}$ ) calcd 328.1500 ( $\text{MH}^+$ ), found 328.1509.

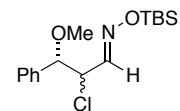

**2-Chloro-3,5,5-trimethylhexanal *O*-TBS-oxime (16).** The product was obtained as a clear oil (2.72 g, 86% yield) as an

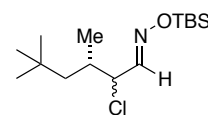

inseparable mixture of isomers: Data for major isomer:  $^1\text{H}$  NMR (300 MHz,  $\text{CDCl}_3$ )  $\delta$  7.50 (d,  $J = 6.1$  Hz, 1H), 4.40 (m, 1H), 2.03 (m, 1H), 1.56 (m, 2H), 1.52 (d,  $J = 2.8$  Hz, 2H), 0.95 (s, 9H), 0.97 (s, 9H), 0.20 (s, 6H);  $^{13}\text{C}$  NMR (75 MHz,  $\text{CDCl}_3$ )  $\delta$  153.8, 64.8, 59.1, 47.7, 47.3, 31.3, 30.3, 26.5, 19.5, 18.6; HRMS-ES+ ( $\text{C}_{15}\text{H}_{33}\text{NOClSi}$ ) calcd 306.2020 ( $\text{MH}^+$ ), found 306.2020.

**General Procedure for the Conjugate Additions to Nitrosoalkenes.** To a stirred solution of the malonate or sulfonamide (2 mmol) in THF (2.2 mL) was added KHMDS (4 mL, 0.5 M in PhMe, 2 mmol) at  $-78$  °C. The resulting solution was then stirred for 45 min at that temperature. The *O*-TBS oxime (1 mmol) dissolved in THF (600  $\mu\text{L}$ ) was added slowly over 1 min, followed by dropwise addition of TBAF (2 mL, 1.0 M in THF, 2 mmol) over 3 min. The resulting solution was immediately transferred to an ice bath and stirred for an additional 2 h. The reaction mixture was diluted with concentrated aqueous  $\text{NH}_4\text{Cl}$  and EtOAc. The organic layer was separated and the aqueous layer was extracted with EtOAc. The combined organic layers were dried over  $\text{Na}_2\text{SO}_4$  and concentrated *in vacuo* to give a residue which was purified by flash column chromatography on silica gel eluting with a mixture of ethyl acetate and hexanes.

**Diethyl 2-Allyl-2-(1-(hydroxyimino)-3-phenylbutan-2-yl)malonate (5).** The product was obtained as a clear oil (43 mg, 74% yield) as a ~9:1 mixture of *E/Z* oxime isomers: (*E*)-Oxime isomer:  $^1\text{H}$

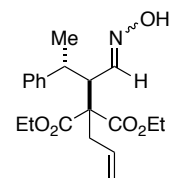

NMR (300 MHz,  $\text{CDCl}_3$ )  $\delta$  7.95 (br s, 1H), 7.66 (d,  $J = 9.6$  Hz, 1H), 7.34-20 (m, 5H), 5.78-5.64 (m, 1H), 5.05 (br s, 1H), 5.00 (br d,  $J = 5.6$  Hz, 1H), 4.28-4.01 (m, 4H), 3.39-3.32 (m, 1H), 3.25 (dd,  $J = 9.6, 4.6$  Hz, 1H), 2.57 (d,  $J = 7.2$  Hz, 2H), 1.32 (t,  $J = 3.6$  Hz, 3H), 1.26 (t,  $J = 3.6$  Hz, 3H), 1.18 (d,  $J = 7.1$  Hz, 3H);  $^{13}\text{C}$  NMR (75 MHz,  $\text{CDCl}_3$ )  $\delta$

170.4, 170.3, 151.0, 146.8, 132.8, 128.7, 128.0, 126.9, 119.7, 62.0, 61.8, 60.9, 49.7, 40.0, 39.4, 19.5, 14.5, 14.4; HRMS-ES+ (C<sub>20</sub>H<sub>28</sub>NO<sub>5</sub>) calcd 362.1967 (MH<sup>+</sup>), found 362.1971.

**Diethyl 2-Ethyl-2-(1-(hydroxyimino)-3-phenylbutan-2-yl)malonate (6).** The product was obtained as a clear oil (93 mg, 72% yield) as a ~ 10:1 mixture of *E/Z* oxime isomers: (*E*)-oxime isomer: <sup>1</sup>H

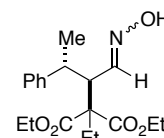

NMR (360 MHz, CDCl<sub>3</sub>) δ 8.46 (br s, 1H), 7.65 (d, *J* = 9.7 Hz, 1H), 7.33-7.19 (m, 5H), 4.31-4.04 (m, 4H), 3.35-3.32 (m, 1H), 3.24 (dd, *J* = 9.7, 4.3 Hz, 1H), 1.91-1.84 (m, 2H), 1.34 (t, *J* = 1.8 Hz, 3H), 1.25 (t, *J* = 1.8 Hz, 3H), 1.17 (d, *J* = 7.7 Hz, 3H), 0.84 (t, *J* = 3.7 Hz, 3H); <sup>13</sup>C NMR (90 MHz, CDCl<sub>3</sub>) δ 170.5, 170.4, 150.5, 146.7, 128.3, 127.6, 126.4, 61.4, 61.3, 60.7, 48.9, 39.1, 28.4, 18.9, 14.1, 14.0, 8.8; HRMS-ES+ (C<sub>19</sub>H<sub>28</sub>NO<sub>5</sub>) calcd 350.1967 (MH<sup>+</sup>), found 350.1963.

**Diethyl 2-(1-(Hydroxyimino)-3-phenylbutan-2-yl)-2-methylmalonate (7).** The product was obtained as a clear oil (37 mg, 63% yield): <sup>1</sup>H NMR (360 MHz, CDCl<sub>3</sub>) δ 7.65 (d, *J* = 9.1 Hz, 1H), 7.49 (br s, 1H), 7.33-7.19 (m, 5H), 4.13-4.00 (m, 4H), 3.30 (m, 2H), 1.43 (s, 3H), 1.36-1.15 (m, 9H); <sup>13</sup>C NMR (90 MHz, CDCl<sub>3</sub>) δ 170.8, 151.4, 146.2, 128.3, 127.8, 126.5, 61.5, 56.9, 50.3, 39.4, 20.9, 20.0, 13.9; HRMS-ES+ (C<sub>18</sub>H<sub>26</sub>NO<sub>5</sub>) calcd 336.1811 (MH<sup>+</sup>), found 336.1810.

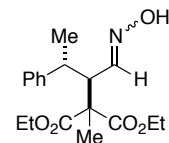

**Diethyl 2-(1-(Hydroxyimino)-3-phenylbutan-2-yl)malonate (8).**

The product was obtained as a clear oil (35 mg, 68% yield): <sup>1</sup>H NMR (300 MHz, CDCl<sub>3</sub>) δ 8.20 (br s, 1H), 7.67 (d, *J* = 7.5 Hz, 1H), 7.38-7.19 (m, 5H) 4.19 (m, 4H), 3.41 (d, *J* = 5.7 Hz, 1H), 3.22-3.08 (m, 2H), 1.30-1.23 (m, 9H); <sup>13</sup>C NMR (75 MHz, CDCl<sub>3</sub>) δ 168.8, 168.3, 151.4, 144.0, 129.2, 127.9, 127.4, 62.2, 62.0,

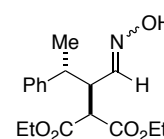

53.7, 47.1, 40.3, 19.6, 14.5; HRMS-ES+ (C<sub>17</sub>H<sub>23</sub>NO<sub>5</sub>Na) calcd 344.1474 (M+Na), found 344.1478.

**Diethyl 2-Allyl-2-(1-(hydroxyimino)-3,5,5-trimethylhexan-2-yl)malonate (17).** The product was obtained as a clear oil (89 mg, 76%

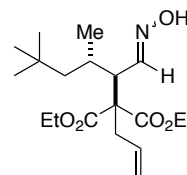

yield): <sup>1</sup>H NMR (300 MHz, CDCl<sub>3</sub>) δ 8.51 (br s, 1H), 7.58 (d, *J* = 9.4 Hz, 1H), 5.78-5.69 (m, 1H), 5.10 (d, *J* = 8.3 Hz, 1H), 5.05 (s, 1H), 4.25-4.11 (m, 4H), 2.88 (dd, *J* = 9.3, 2.0 Hz, 1H), 2.80 (q, *J* = 2.1 Hz, 1H), 2.60 (q, *J* = 2.1 Hz, 1H), 2.1 (m, 1H), 1.36 (dd, *J* = 11.8, 2.3 Hz, 1H), 1.33 (t, *J* = 3.6 Hz, 3H), 1.24 (t, *J* = 3.6 Hz, 3H), 1.10 (dd, *J* = 14.1, 7.7 Hz, 1H), 0.90 (br s, 9H), 0.83, (d, *J* = 6.9 Hz, 3H); <sup>13</sup>C NMR (75 MHz, CDCl<sub>3</sub>) δ 170.8, 170.6, 150.8, 132.7, 119.6, 61.9, 61.8, 60.5, 51.9, 49.7, 39.5, 31.7, 30.9, 29.3, 17.9, 14.6, 14.4; HRMS-ES+ (C<sub>19</sub>H<sub>33</sub>NO<sub>5</sub>) calcd 356.2437 (MH<sup>+</sup>), found 356.2428.

***N*-(1-(Hydroxyimino)-3,5,5-trimethylhexan-2-yl)-*N*,4-dimethylbenzenesulfonamide (20).** The product was obtained as a

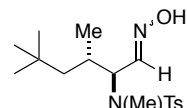

clear oil (41 mg, 74% yield): <sup>1</sup>H NMR (360 MHz, CDCl<sub>3</sub>) δ 7.71 (d, *J* = 8.2 Hz, 1H), 7.31 (d, *J* = 9.1 Hz, 2H), 7.16 (d, *J* = 7.6 Hz, 2H), 6.91 (s, 1H), 4.23 (dd, *J* = 10.4, 7.8 Hz, 1H), 2.75 (s, 3H), 2.45 (s, 3H), 1.86 (m, 1H), 1.07 (dd, *J* = 11.5, 7.8 Hz, 2H), 0.98 (d, *J* = 6.6 Hz, 3H) 0.95 (s, 9H); <sup>13</sup>C NMR (90 MHz, CDCl<sub>3</sub>) δ 147.8, 143.4, 135.9, 129.5, 127.6, 76.7, 61.9, 46.3, 30.8, 30.0, 29.8, 21.5, 19.7; HRMS-ES+ (C<sub>17</sub>H<sub>29</sub>N<sub>2</sub>O<sub>3</sub>S) calcd 341.1899 (MH<sup>+</sup>), found 341.1894.

**Synthesis of Diethyl 2-Allyl-2-(3-(Hydroxyimino)-1-methoxy-1-phenylpropan-2-yl)malonate (13).** To a stirred solution of diethyl allyl malonate (1.2 mmol) in THF (2.2 mL) was added KHMDS (2.4 mL,

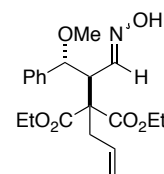

0.5 M in PhMe, 1.2 mmol) at -78 °C. The resulting solution was then stirred for 45 min at that temperature. TBAF was added (1.2 mL, 1.0 M in THF, 1.2 mmol) followed by dropwise addition of a solution of the *O*-TBS oxime **12** (1 mmol) dissolved in THF (600  $\mu$ L). The resulting solution was immediately transferred to a 0 °C bath and stirred for an additional 1 h. The reaction mixture was diluted with concentrated aqueous NH<sub>4</sub>Cl and EtOAc. The organic layer was separated and the aqueous layer was extracted with EtOAc. The combined organic layers were dried over Na<sub>2</sub>SO<sub>4</sub> and concentrated *in vacuo* to give a gradient of 25-50% EtOAc/hexanes. The product was obtained as a clear oil (39 mg) in 68% yield: <sup>1</sup>H NMR (300 MHz, CDCl<sub>3</sub>)  $\delta$  7.78 (br s, 1H), 7.62 (d, *J* = 9.6 Hz, 1H), 7.37-7.24 (m, 5H), 5.68-5.54 (m, 1H), 5.11-5.05 (m, 2H), 4.81 (s, 1H), 4.38-4.16 (m, 4 H), 3.12 (s, 3H), 3.06 (d, *J* = 9.6 Hz, 1H), 2.72-2.70 (m, 2H) 1.36 (t, *J* = 3.6 Hz, 6H); <sup>13</sup>C NMR (75 MHz, CDCl<sub>3</sub>)  $\delta$  171.0, 170.6, 148.6, 140.4, 131.5, 128.6, 127.9, 127.1, 120.2, 82.3, 61.9, 59.2, 57.2, 50.3, 38.9, 14.6, 14.5; HRMS-ES<sup>+</sup> (C<sub>20</sub>H<sub>28</sub>NO<sub>6</sub>) calcd 378.1917 (MH<sup>+</sup>), found 1378.1920.

**General Procedure for the Synthesis of Isoxazolidines.** A solution of  $\alpha$ -alkyl aldoxime (0.1 mmol) in toluene (4 mL) was heated and stirred in a sealed tube at 190 °C for 5 h. The solution was concentrated *in vacuo* and the residue was purified by flash column chromatography on silica gel eluting with a mixture of ethyl acetate and hexanes.

**Diethyl 6-(1-Phenylethyl)tetrahydro-1*H*-cyclopenta[*c*]isoxazole-5,5(3*H*)-dicarboxylate (10).** The product was obtained as a clear oil (49 mg, 57% yield): <sup>1</sup>H NMR (300 MHz, CDCl<sub>3</sub>)

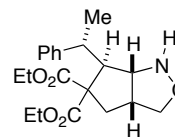

$\delta$  7.31-7.22 (m, 4H), 7.16-7.11 (m, 1H), 5.20 (br s, 1H), 4.26 (q, *J* = 2.4 Hz, 2H), 4.04 (t, *J* = 4.4 Hz, 1H), 3.91 (br d, *J* = 8.5 Hz, 1H), 3.67-3.56 (m, 2H), 3.54-3.45 (m, 1H), 3.40-

3.28 (m, 1H), 3.06-2.95 (m, 1H), 2.67 (t,  $J = 4.5$  Hz, 1H), 2.57 (dd,  $J = 12.7, 8.0$  Hz, 1H), 2.07-1.98 (m, 1H), 1.34 (d,  $J = 5.2$  Hz, 3H), 1.31 (t,  $J = 2.6$  Hz, 3H), 1.00 (t,  $J = 3.6$  Hz, 3H);  $^{13}\text{C}$  NMR (100 MHz,  $\text{CDCl}_3$ )  $\delta$  171.4, 170.8, 146.7, 128.5, 128.3, 126.4, 77.5, 69.6, 63.8, 61.5, 61.4, 58.2, 46.6, 41.8, 39.7, 22.5, 14.5, 14.0; HRMS-ES+ ( $\text{C}_{20}\text{H}_{28}\text{NO}_5$ ) calcd 362.1967 (MH+), found 362.1970.

**Diethyl 6-(Methoxy(phenyl)methyl)tetrahydro-1H-cyclopenta[*c*]isoxazole-5,5(3*H*)-dicarboxylate (14).** The product was

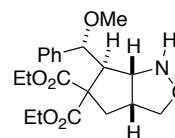

obtained as a clear oil (26 mg, 66% yield):  $^1\text{H}$  NMR (360 MHz,  $\text{CDCl}_3$ )

$\delta$  7.37-7.27 (m, 5H), 4.86 (d,  $J = 1.8$  Hz, 1H), 4.42-4.35 (m, 2H), 4.33-4.09 (m, 4H), 3.73 (d,  $J = 8.4$  Hz, 1H), 3.49-3.35 (m, 2H), 3.20 (s, 3H), 2.76 (dd,  $J = 8.0, 1.85$  Hz, 1H), 2.66 (dd,  $J = 13.0, 8.2$  Hz, 1H), 1.63 (dd,  $J = 13.0, 9.3$  Hz, 1H), 1.36 (t,  $J = 3.6$  Hz, 3H), 1.30 (t,  $J = 3.6$  Hz, 3H);  $^{13}\text{C}$  NMR (90 MHz,  $\text{CDCl}_3$ )  $\delta$  171.6, 171.3, 140.4, 128.3, 127.3, 126.4, 79.9, 76.7, 63.9, 62.7, 61.3, 61.2, 59.1, 56.8, 47.7, 39.9, 14.1, 14.0; HRMS-ES+ ( $\text{C}_{20}\text{H}_{28}\text{NO}_6$ ) calcd 378.1917 (MH+), found 378.1927.

**General Procedure for Synthesis of *N*-Tosyl Isoxazolidines.** To a stirred solution of isoxazolidine (0.1 mmol) was added TsCl (19 mg, 0.1 mmol) and  $\text{K}_2\text{CO}_3$  (28 mg, 0.2 mmol). The reaction mixture was heated at reflux for 60 h and then diluted with  $\text{H}_2\text{O}$  and  $\text{CH}_2\text{Cl}_2$ . The organic layer was separated and the aqueous layer was extracted with  $\text{CH}_2\text{Cl}_2$ . The combined organic layers were dried over  $\text{Na}_2\text{SO}_4$  and concentrated in vacuo to give a residue, which was purified by flash column chromatography on silica gel eluting with a mixture of ethyl acetate and hexanes.

**Diethyl 6-(1-Phenylethyl)-1-(4-methylbenzenesulfonyl)tetrahydro-1H-cyclopenta[*c*]isoxazole-**

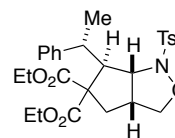



**5,5(3*H*)-dicarboxylate (11).** The product was obtained as a white solid (38 mg, 75% yield); X-ray quality crystals were prepared via slow evaporation from isopropanol/dichloromethane; <sup>1</sup>H NMR (400 MHz, CDCl<sub>3</sub>) δ 7.73 (d, *J* = 7.5 Hz, 2H), 7.42 (d, *J* = 7.1 Hz, 2H), 7.33-7.26 (m, 4H), 7.19-7.18 (m, 1H), 5.05 (t, *J* = 4.4 Hz, 1H), 4.51 (t, *J* = 3.6 Hz, 1H), 4.29 (q, *J* = 2.3 Hz, 2H), 3.84-3.78 (m, 1H), 3.72-3.63 (m, 2H), 3.41 (t, *J* = 3.9, 1H), 2.84 (t, *J* = 3.3 Hz, 1H), 2.68 (dd, *J* = 12.3, 8.7 Hz, 1H), 2.45 (s, 3H), 1.88 (t, *J* = 5.2 Hz, 1H), 1.48 (d, *J* = 6.7 Hz, 3H), 1.34 (t, *J* = 3.4 Hz, 3H), 1.11 (t, *J* = 3.4 Hz, 3H); <sup>13</sup>C NMR (75 MHz, CDCl<sub>3</sub>) δ 171.0, 170.6, 146.8, 145.3, 134.0, 130.0, 129.3, 128.6, 128.3, 126.3, 65.9, 64.1, 62.0, 61.8, 57.4, 45.9, 41.8, 38.5, 22.1, 19.1, 14.5, 14.2; HRMS-ES<sup>+</sup> (C<sub>27</sub>H<sub>34</sub>NO<sub>7</sub>S) calcd 516.2056 (MH<sup>+</sup>), found 516.2053.

**Diethyl 6-(Methoxy(phenyl)methyl)-1-(4-methylbenzenesulfonyl)tetrahydro-1*H*-cyclopenta[*c*]isoxazole-**

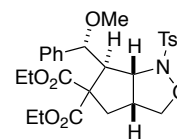

**5,5(3*H*)-dicarboxylate (15).** The product was obtained as a white solid (22 mg, 68% yield); X-ray quality crystals were prepared via slow evaporation from isopropanol/dichloromethane; <sup>1</sup>H NMR (300 MHz, CDCl<sub>3</sub>) δ 7.61 (d, *J* = 7.1 Hz, 2H), 7.43 (t, *J* = 3.5 Hz, 2H), 7.34-7.25 (m, 3H), 7.16 (d, *J* = 8.1 Hz, 2H), 5.45 (t, *J* = 4.5 Hz, 1H), 4.90 (s, 1H), 4.47 (t, *J* = 3.7 Hz, 1H), 4.41-4.32 (m, 1H), 4.31-4.17 (m, 4H), 3.64 (t, *J* = 4.3 Hz, 1H), 3.54 (d, *J* = 8.2 Hz, 1H), 3.30 (s, 3H), 2.93 (d, *J* = 8.9 Hz, 1H), 2.78 (dd, *J* = 13.3, 8.7 Hz, 1H), 2.39 (s, 1H), 1.69-1.61 (m, 2H), 1.41 (t, *J* = 3.6 Hz, 3H), 1.33 (t, *J* = 3.6 Hz, 3H); <sup>13</sup>C NMR (75 MHz, CDCl<sub>3</sub>) δ 171.4, 171.3, 144.7, 140.5, 134.1, 129.5, 129.3, 128.5, 127.4, 127.0, 79.1, 77.5, 63.3, 62.1, 62.0, 58.7, 57.7, 46.8, 40.6, 30.1, 22.0, 14.5; HRMS-ES<sup>+</sup> (C<sub>27</sub>H<sub>34</sub>NO<sub>8</sub>S) calcd 532.2005 (MH<sup>+</sup>), found 532.1996.

**Synthesis of Diethyl 6-(4,4-Dimethylpentan-2-yl)-1-(4-nitrobenzenesulfonyl)tetrahydro-1*H*-cyclopenta[*c*]isoxazole-5,5(3*H*)-dicarboxylate (19).** A solution of diethyl 2-allyl-2-(1-

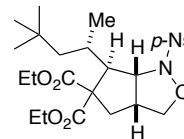

(hydroxyimino)-3,5,5-trimethylhexan-2-yl)malonate (**17**, 0.04 mmol) in toluene (4 mL) was heated and stirred in a sealed tube at 190 °C for 5 h. The solution was concentrated *in vacuo*. The crude residue was dissolved in CH<sub>2</sub>Cl<sub>2</sub> (430 uL) and to this solution was added NsCl (11 mg, 0.05 mmol) and TEA (7 uL, 0.05 mmol). The reaction mixture was stirred for 7 h at rt and then diluted with CH<sub>2</sub>Cl<sub>2</sub>. The combined organic layers were washed with water, dried over Na<sub>2</sub>SO<sub>4</sub> and concentrated *in vacuo* to give a residue which was purified by flash column chromatography on silica gel eluting with 10-50% EtOAc/hexanes. The product was obtained as a white solid (16 mg, 68% yield); X-ray quality crystals were prepared via slow evaporation from isopropanol/dichloromethane; <sup>1</sup>H NMR (360 MHz, CDCl<sub>3</sub>) δ 8.42 (d, *J* = 8.8 Hz, 2H), 8.18 (d, *J* = 8.8 Hz, 2H), 5.02 (t, *J* = 3.6 Hz, 1H), 4.46 (t, *J* = 3.9 Hz, 1H), 4.32-4.12 (m, 4H), 3.73 (d, *J* = 8.1 Hz, 1H), 3.66-3.58 (m, 1H), 2.73 (t, *J* = 6.5 Hz, 2H), 2.33 (br s, 1H), 1.73 (dd, *J* = 13.4, 9.1 Hz, 1H), 1.65 (d, *J* = 3.5 Hz, 1H), 1.61 (s, 1H), 1.45 (*J* = 13.9, 7.4 Hz, 1H), 1.32 (t, *J* = 3.6 Hz, 3H), 1.27 (t, *J* = 3.6 Hz, 3H), 1.00 (m, 11H); <sup>13</sup>C NMR (90 MHz, CDCl<sub>3</sub>) δ 171.0, 170.4, 150.7, 142.9, 130.1, 124.1, 76.7, 63.8, 63.5, 61.7, 61.4, 57.4, 52.4, 46.3, 40.3, 31.3, 30.0, 27.9, 17.6, 14.1, 13.9; HRMS-ES<sup>+</sup> (C<sub>25</sub>H<sub>37</sub>N<sub>2</sub>O<sub>9</sub>S) calcd 541.2220 (MH<sup>+</sup>), found 541.2206.

**General Procedure for the Conversion of Aldoximes to Nitriles.** A solution of α-alkyl aldoxime in pyridine (710 uL) was added MsCl (55 uL, 0.7 mmol) at 0 °C and the mixture was stirred for 12 h. The solution was diluted with H<sub>2</sub>O and extracted with

CH<sub>2</sub>Cl<sub>2</sub>. The combined organic layers were washed with water, dried over Na<sub>2</sub>SO<sub>4</sub> and concentrated *in vacuo* to give a residue which was purified by flash column chromatography on silica gel eluting with 5- 25% EtOAc/hexanes.

**Diethyl 2-(1-Cyano-2-phenylpropyl)-2-ethylmalonate.** The product was obtained as a clear oil (17 mg, 73% yield): <sup>1</sup>H NMR (300 MHz, CDCl<sub>3</sub>) δ 7.40-7.27 (m, 5H), 4.32-4.19 (m, 4H), 3.59 (d, *J* = 3.1 Hz, 1H), 3.25-3.16 (m, 1H), 2.25-2.14 (m, 2H), 1.43 (d, *J* = 7.1 Hz, 3H), 1.36-1.29 (m, 6H), 0.94 (t, *J* = 3.8 Hz, 3H); <sup>13</sup>C NMR (75 MHz, CDCl<sub>3</sub>) δ 169.6, 169.3, 145.0, 129.3, 127.7, 127.4, 118.5, 62.5, 59.8, 42.9, 37.3, 27.2, 18.8, 14.4, 9.1; HRMS-ES+ (C<sub>19</sub>H<sub>26</sub>NO<sub>4</sub>) calcd 332.1862 (MH<sup>+</sup>), found 332.1860.

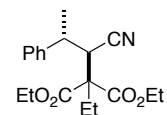

***N*-(1-Cyano-2,4,4-trimethylpentyl)-*N*,4-dimethylbenzenesulfonamide (21).** The product was obtained as a clear oil (17 mg, 60% yield): <sup>1</sup>H NMR (300 MHz, CDCl<sub>3</sub>) δ 7.73 (d, *J* = 8.2 Hz, 2H), 7.40 (d, *J* = 8.1 Hz, 2H), 4.43 (d, *J* = 10.3 Hz, 1H), 2.83 (s, 3H), 2.48 (s, 3H), 1.92-1.86 (m, 1H), 1.75 (d, *J* = 13.9 Hz, 2H), 1.22 (d, *J* = 6.6 Hz, 3H), 0.97 (s, 9H); <sup>13</sup>C NMR (75 MHz, CDCl<sub>3</sub>) δ 145.0, 133.8, 130.5, 128.0, 115.7, 56.5, 46.1, 32.2, 31.7, 30.6, 30.1, 22.1, 20.1; HRMS-ES+ (C<sub>17</sub>H<sub>27</sub>N<sub>2</sub>O<sub>2</sub>S) calcd 323.1793 (MH<sup>+</sup>), found 323.1797.

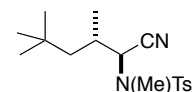

X-Ray Structure of Compound 11.

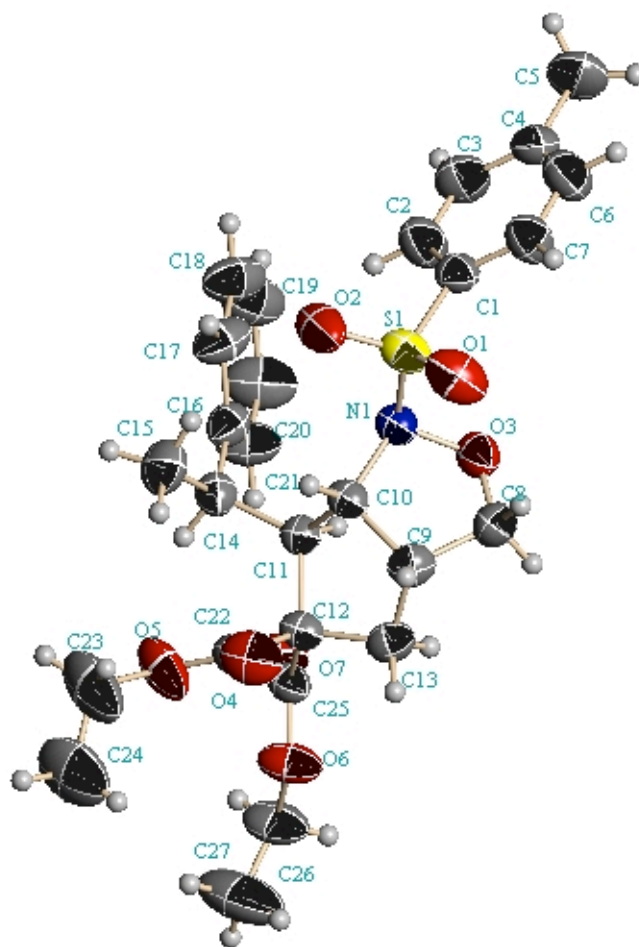

X-Ray Structure of Compound 15.

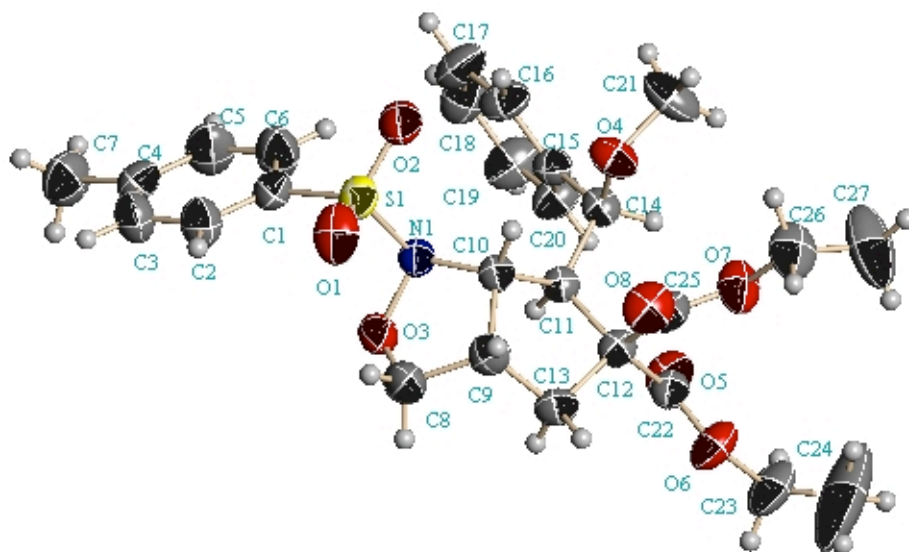



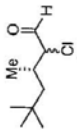

after column  
6-21

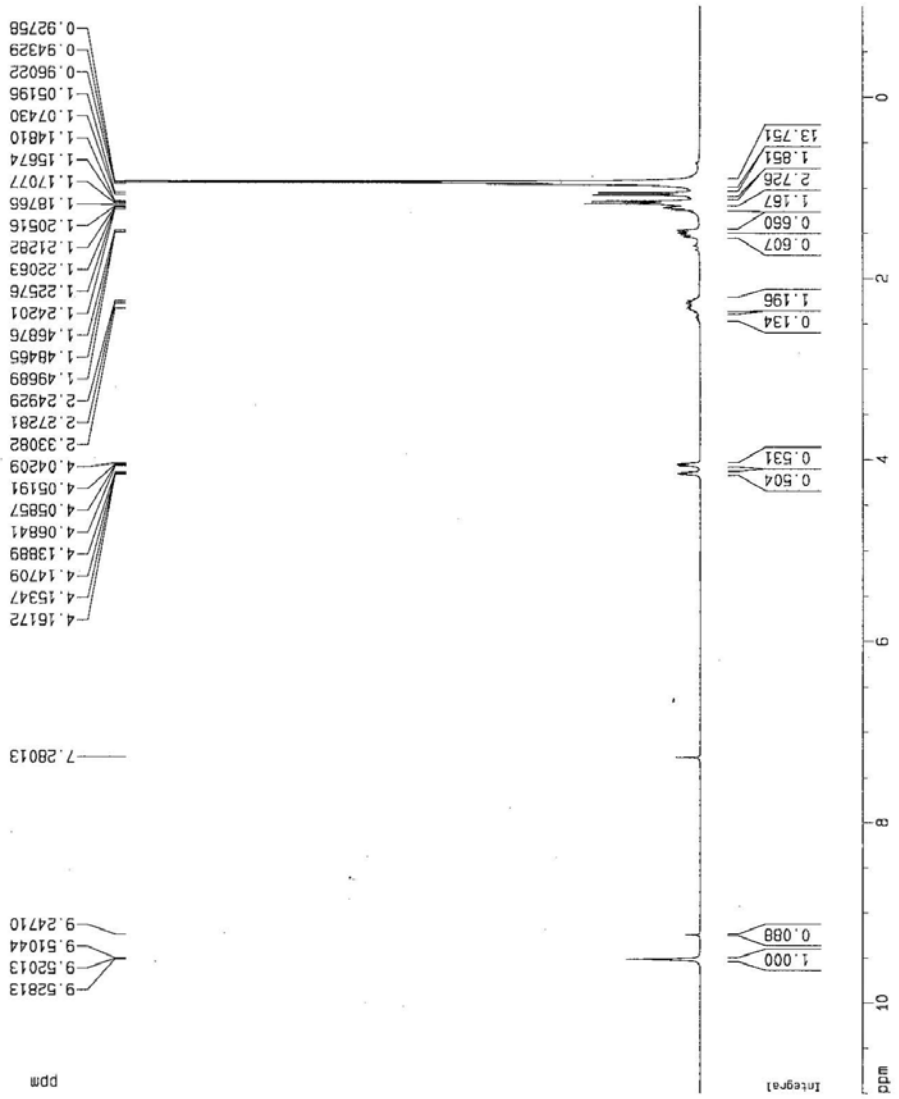

Current Data Parameters  
 NAME jsw-2-079  
 EXPNO 1  
 PROCNO 1

F2 - Acquisition Parameters  
 Date\_ 20100902  
 Time 12.02  
 INSTRUM spect  
 PULPROG 5 mm Multirru  
 TD 2630  
 FIDRES 0.250014 Hz  
 AQ 1.9999400 sec  
 RG 228.1  
 DM 81.000 usec  
 DE 6.00 usec  
 TE 300.0 K  
 D1 1.00000000 sec

===== CHANNEL f1 =====  
 NUC1 1H  
 P1 9.50 usec  
 PL1 -6.00 dB  
 SF01 300.1318534 MHz

F2 - Processing parameters  
 SI 32768  
 SF 300.1300000 MHz  
 NDM 0  
 SSB 0  
 LB 0.00 Hz  
 GB 0  
 PC 1.00

1D NMR plot parameters  
 CX 20.00 cm  
 F1P 11.000 ppm  
 F1 3301.43 Hz  
 F2P -1.000 ppm  
 F2 -300.13 Hz  
 PPMCM 0.50000 ppm/cm  
 HZCM 180.07800 Hz/cm

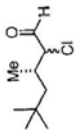

197.036  
196.555

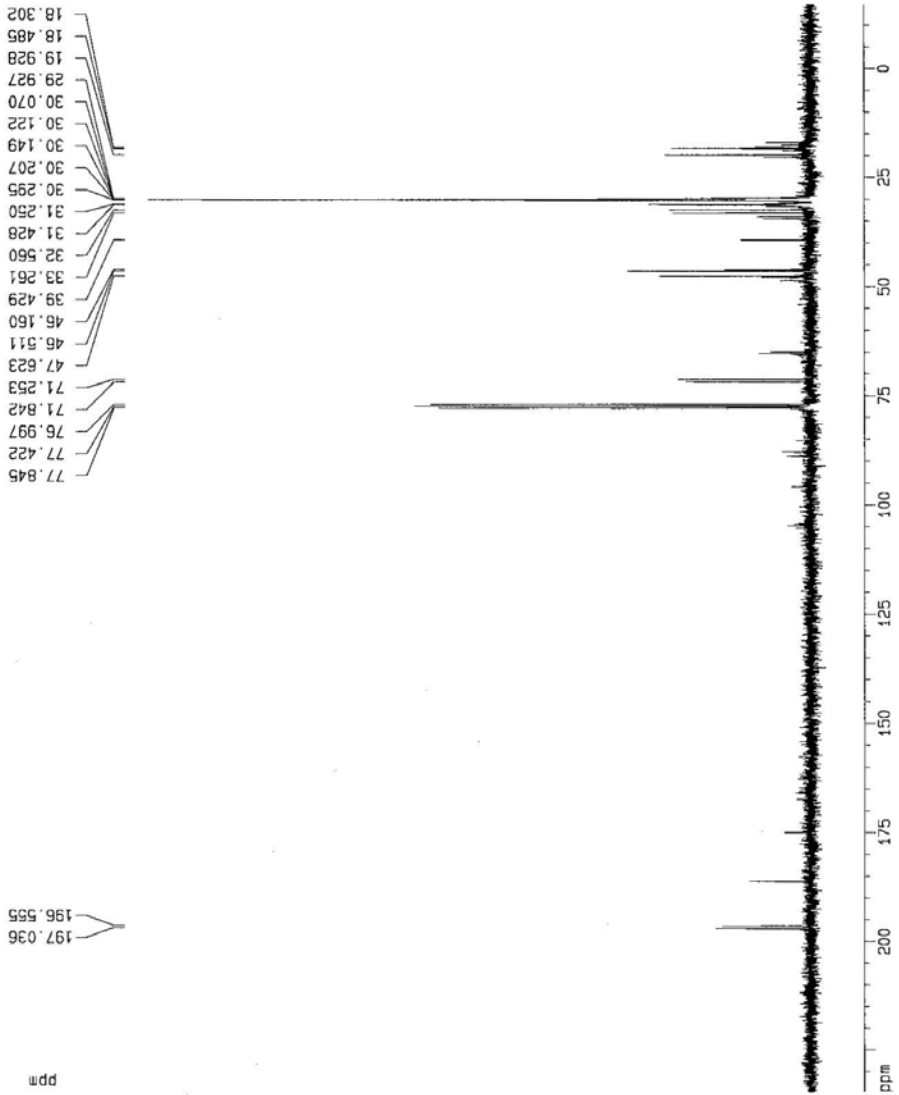

Current Data Parameters  
NAME Jsw-2-079  
EXPNO 1  
PROCNO 1

F2 - Acquisition Parameters  
Date\_ 2011084  
Time 19:57  
INSTRUM spect  
PROBHD 5 mm MSLT100  
PULPROG zgpg30  
TD 65536  
SOLVENT CDCl3  
NS 540  
DS 4  
SWH 18832.363 Hz  
FIDRES 0.374773 Hz  
AQ 0.9700404 sec  
RG 1185.2  
DM 20.590 usec  
DE 6.00 usec  
TE 300.0 K  
D1 2.00000000 sec  
d11 0.00000000 sec  
d12 0.00000000 sec

\*\*\*\*\* CHANNEL f1 \*\*\*\*\*  
NUC1 13C  
P1 11.60 usec  
PL1 0.00 dB  
SFO1 75.476200 MHz

\*\*\*\*\* CHANNEL f2 \*\*\*\*\*  
CPDPRG2 waltz16  
NUC2 1H  
PCPD2 110.00 usec  
PL2 0.00 dB  
PL12 17.50 dB  
PL13 17.50 dB  
SFO2 300.1312005 MHz

F2 - Processing parameters  
SI 32768  
SF 75.4577190 MHz  
WDW EM  
SSB 0  
LB 1.00 Hz  
GB 0  
BB 0  
PC 1.40

1D NMR plot parameters  
CX 20.00 cm  
F1P 254.765 ppm  
F1 17717.15 Hz  
F2P -14.778 ppm  
F2 -1135.24 Hz  
PPOCK 12.47732 ppm/cm  
HZCK 941.61951 Hz/cm



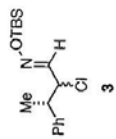

after column

Current Data Parameters  
 NAME jaw-1-156  
 EXNO 1  
 PROCNO 1

F2 - Acquisition Parameters  
 Date\_ 2010026  
 Time 10.45  
 INSTRUM spect  
 PROBHD 5 mm GNP 1H/1  
 PULPROG zg30  
 TD 24690  
 SOLVENT CDCl3  
 NS 16  
 DS 2  
 SWH 6172.839 Hz  
 FIDRES 0.250014 Hz  
 AQ 1.9959400 sec  
 RG 382  
 DW 81.000 usec  
 DE 6.00 usec  
 TE 300.0 K  
 D1 1.00000000 sec

\*\*\*\*\* CHANNEL f1 \*\*\*\*\*  
 NUC1 31P  
 P1 11.70 usec  
 PL1 0.00 dB  
 SFO1 299.8718518 MHz

F2 - Processing parameters  
 SI 32768  
 SF 299.870000 MHz  
 NDM no  
 SSB no  
 LB 0.00 Hz  
 GB 0  
 PC 1.00

1D NMR plot parameters  
 CX 20.00 cm  
 F1P 11.000 ppm  
 F1 3298.57 Hz  
 F2P -1.000 ppm  
 F2 -299.87 Hz  
 PPH0H 0.66000 ppm/cm  
 HZCM 179.32200 Hz/cm

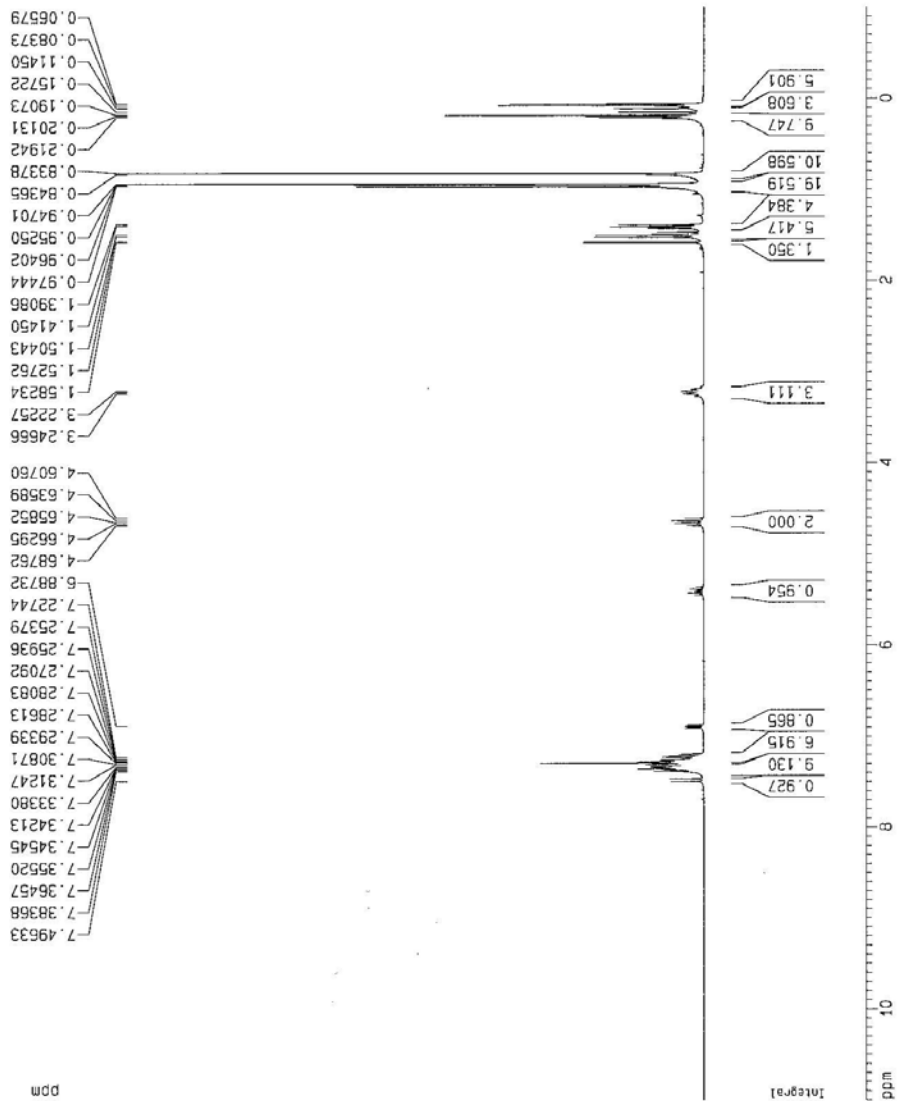

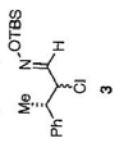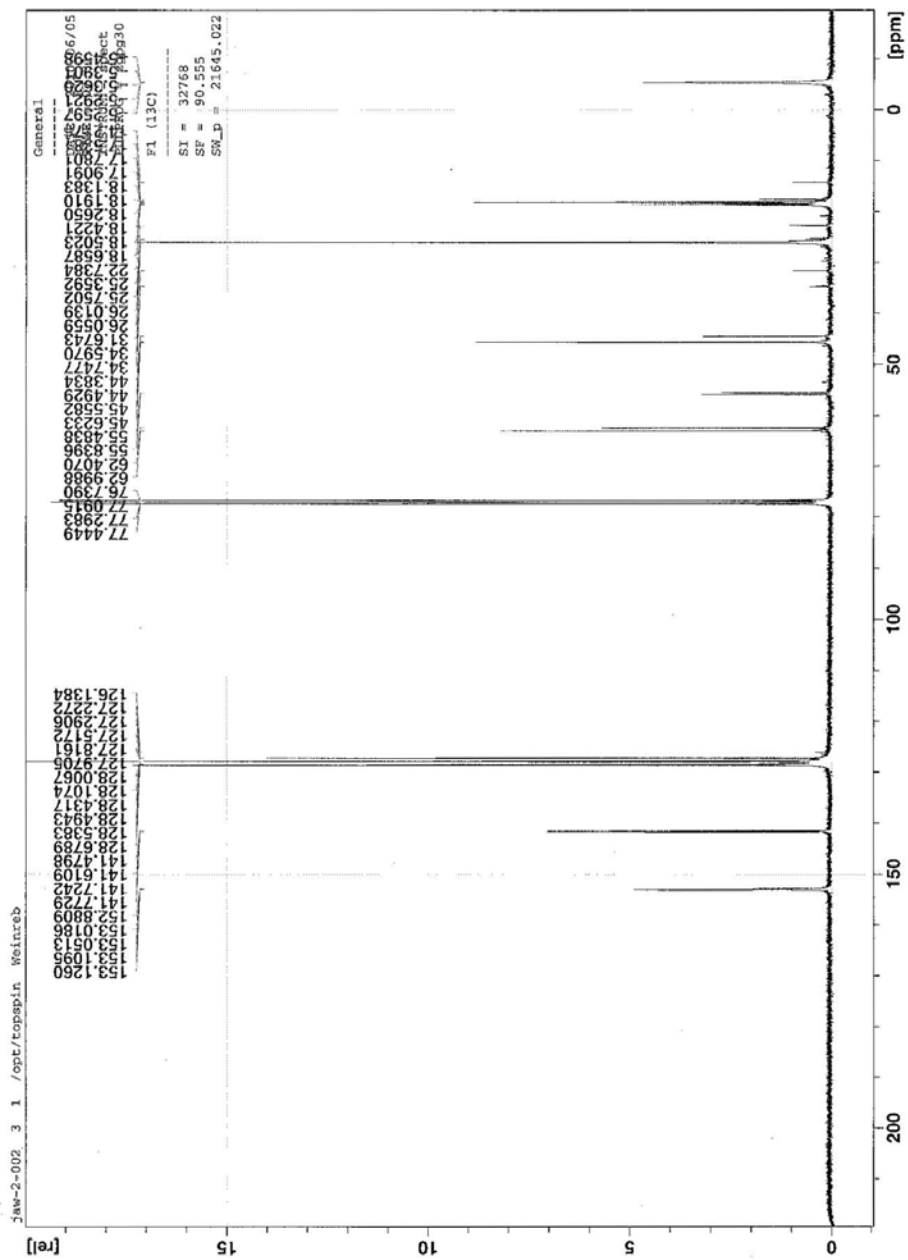



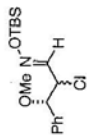

12

jaw-2-035 2 1 /opt/topspin Weinreb

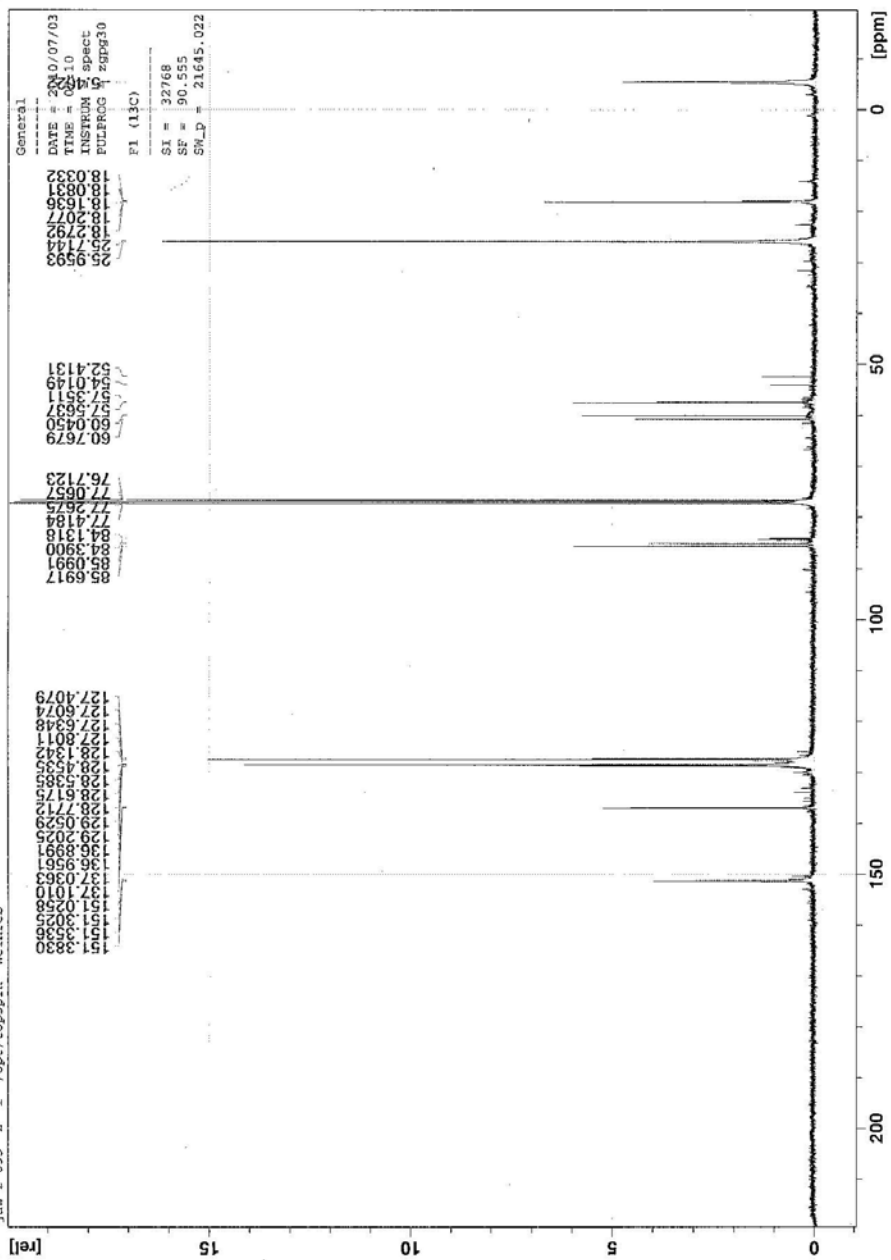

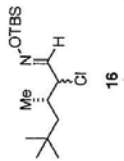

Current Data Parameters  
 NAME |aw-2-091  
 EXPNO 1  
 PROCNO 1

F2 - Acquisition Parameters  
 Date\_ 20100904  
 Time 11:56  
 INSTRUM spect  
 PROBHD 5 mm QNP 1H/1  
 PULPROG zg30  
 TD 24690  
 SOLVENT CCl3  
 NS 16  
 DS 2  
 SFO1 6172.839 Hz  
 FIDRES 0.250014 Hz  
 AQ 1.9999400 sec  
 RG 20.2  
 DK B1.000 usec  
 DE 6.00 usec  
 TE 300.0 K  
 D1 1.00000000 sec

\*\*\*\*\* CHANNEL f1 \*\*\*\*\*  
 NUC1 1H  
 P1 11.70 usec  
 PL1 0.00 dB  
 SFO1 299.8718518 MHz

F2 - Processing parameters  
 SI 32768  
 SF 299.8700000 MHz  
 WDW no  
 SSB 0  
 LB 0.00 Hz  
 GB 0  
 PC 1.00

1D NMR plot parameters.  
 CX 20.00 cm  
 F1P 11.000 ppm  
 F1 3296.57 Hz  
 F2P -1.000 ppm  
 F2 -299.87 Hz  
 PPMCM 0.60000 ppm/cm  
 HZCM 179.92200 Hz/cm

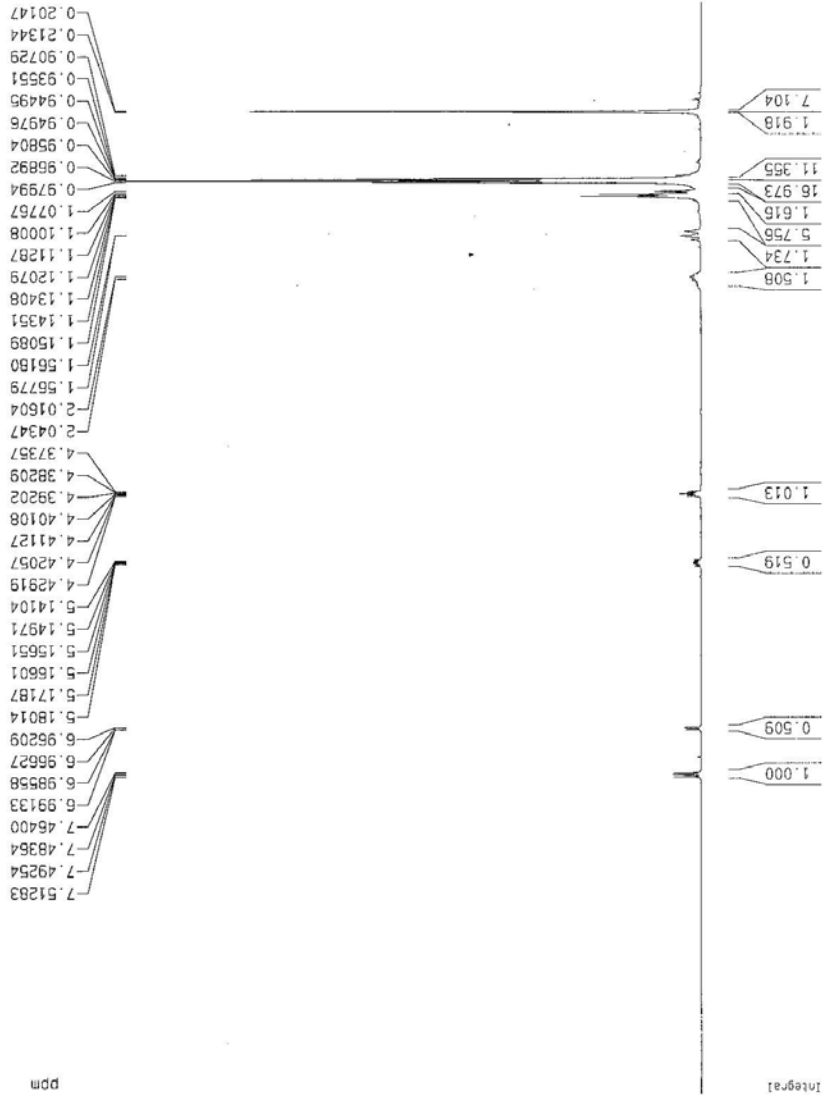





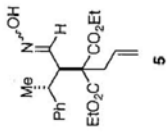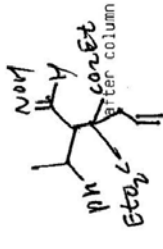

Current Data Parameters  
 NAME JAW-1-117  
 EXPNO 2  
 PROCNO 1

F2 - Acquisition Parameters  
 Date\_ 2009126  
 Time 19.13  
 INSTRUM spect  
 PROBHD 5 mm QNP 1H/1  
 PULPROG zgpg30  
 TD 65536  
 SOLVENT CDCl3  
 NS 1024  
 DS 4  
 SFO1 16756.992 Hz  
 FIDRES 0.288819 Hz  
 AQ 1.7433075 sec  
 R6 5.12  
 DM 26.600 usec  
 DE 6.00 usec  
 TE 300.0 K  
 D1 2.00000000 sec  
 D11 0.03000000 sec  
 D12 0.00002000 sec

\*\*\*\*\* CHANNEL f1 \*\*\*\*\*  
 NUC1 13C  
 P1 5.40 usec  
 PL1 -6.00 dB  
 SFO1 75.4106357 MHz

\*\*\*\*\* CHANNEL f2 \*\*\*\*\*  
 CPDPRG2 MARI215  
 NUC2 1H  
 P2 115.00 usec  
 PL2 0.00 dB  
 PL12 20.00 dB  
 PL13 20.00 dB  
 SFO2 299.6716955 MHz

F2 - Processing parameters  
 SI 32768  
 SF 75.4023410 MHz  
 WOK EM  
 SSB 0  
 LB 1.00 Hz  
 GB 0  
 PC 1.40

1D NMR plot parameters  
 CX 20.00 cm  
 F1p 234.651 ppm  
 F1 17693.24 Hz  
 F2p -14.638 ppm  
 F2 -1103.75 Hz  
 PRMCM 12.46446 ppm/cm  
 HZCM 939.84957 Hz/cm

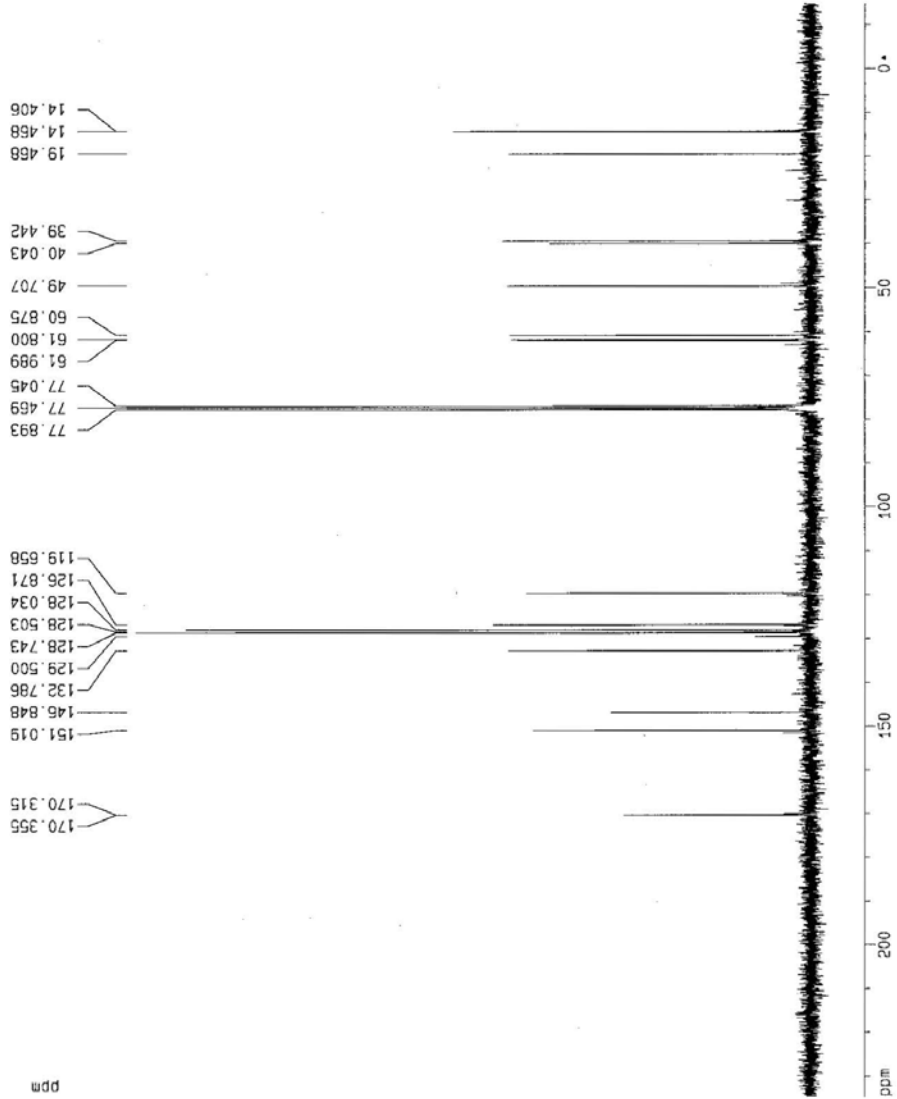









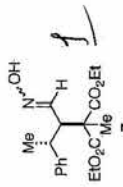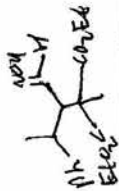

jaw-1-114 3 1 /opt/topspin Weinreb  
 after column

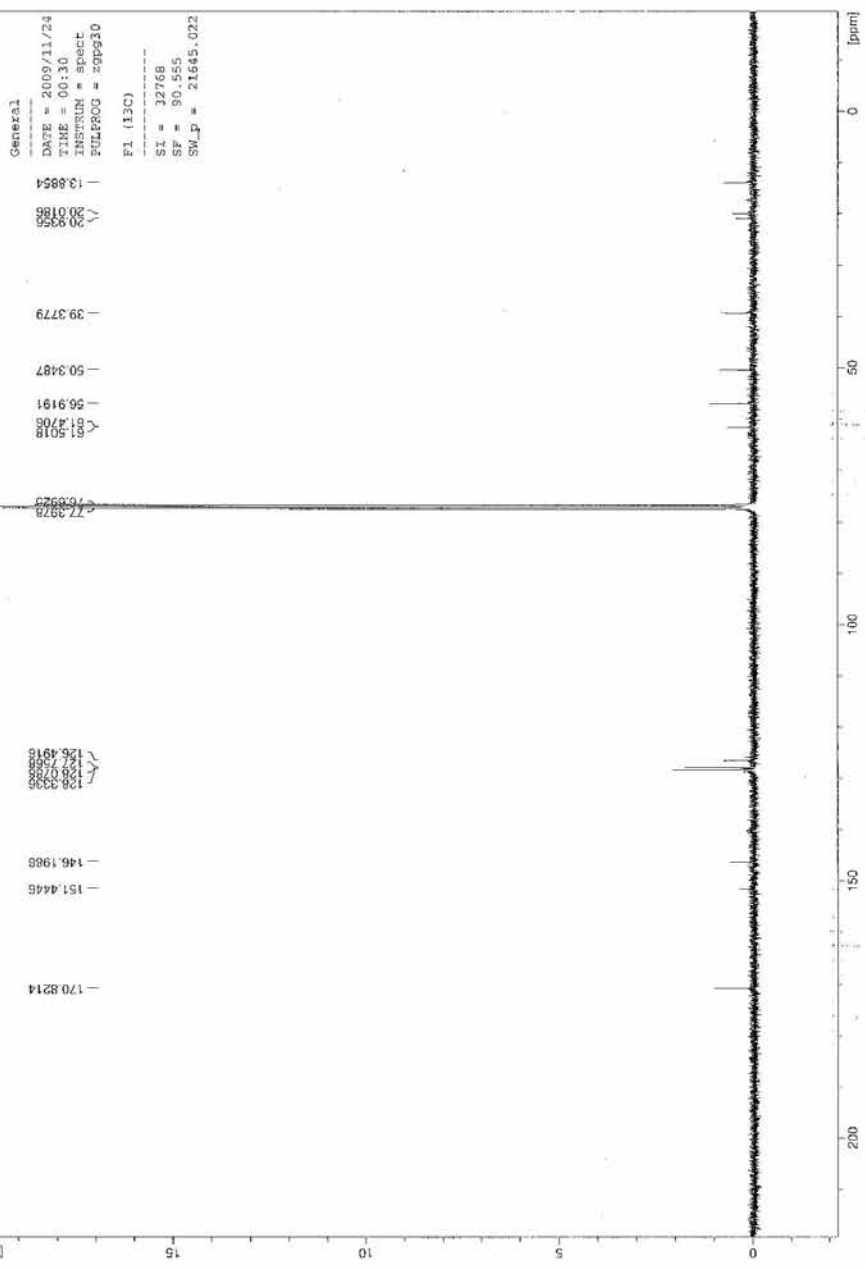

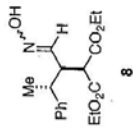

Jaw-1-130

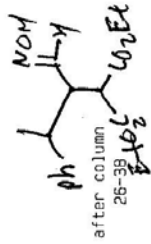

Current Data Parameters  
 NAME Jaw-1-130  
 EXPNO 2  
 PROCNO 1

F2 - Acquisition Parameters  
 Date\_ 20091221  
 Time 22.10  
 INSTRUM spect  
 PROCNO 5  
 PULPROG zg30  
 TO 24690  
 SOLVENT CDCl3  
 NS 16  
 DS 2  
 SWH 6172.839 Hz  
 FIDRES 0.250014 Hz  
 AQ 1.9989400 sec  
 RG 128  
 DK 81.000 usec  
 DE 6.00 usec  
 TE 300.0 K  
 D1 1.00000000 sec

===== CHANNEL f1 =====  
 NUC1 1H  
 P1 11.70 usec  
 PL1 0.00 dB  
 SF01 299.8716518 MHz

F2 - Processing parameters  
 SI 32768  
 SF 299.8700000 MHz  
 KW no  
 SSB 0  
 LB 0.00 Hz  
 GB 0  
 PC 1.00

1D NMR plot parameters  
 CX 20.00 cm  
 FIP 11.000 gpa  
 F1 3289.57 Hz  
 F2P -299.87 Hz  
 PPMCN 0.60000 ppm/cm  
 HZCM 179.9200 Hz/cm

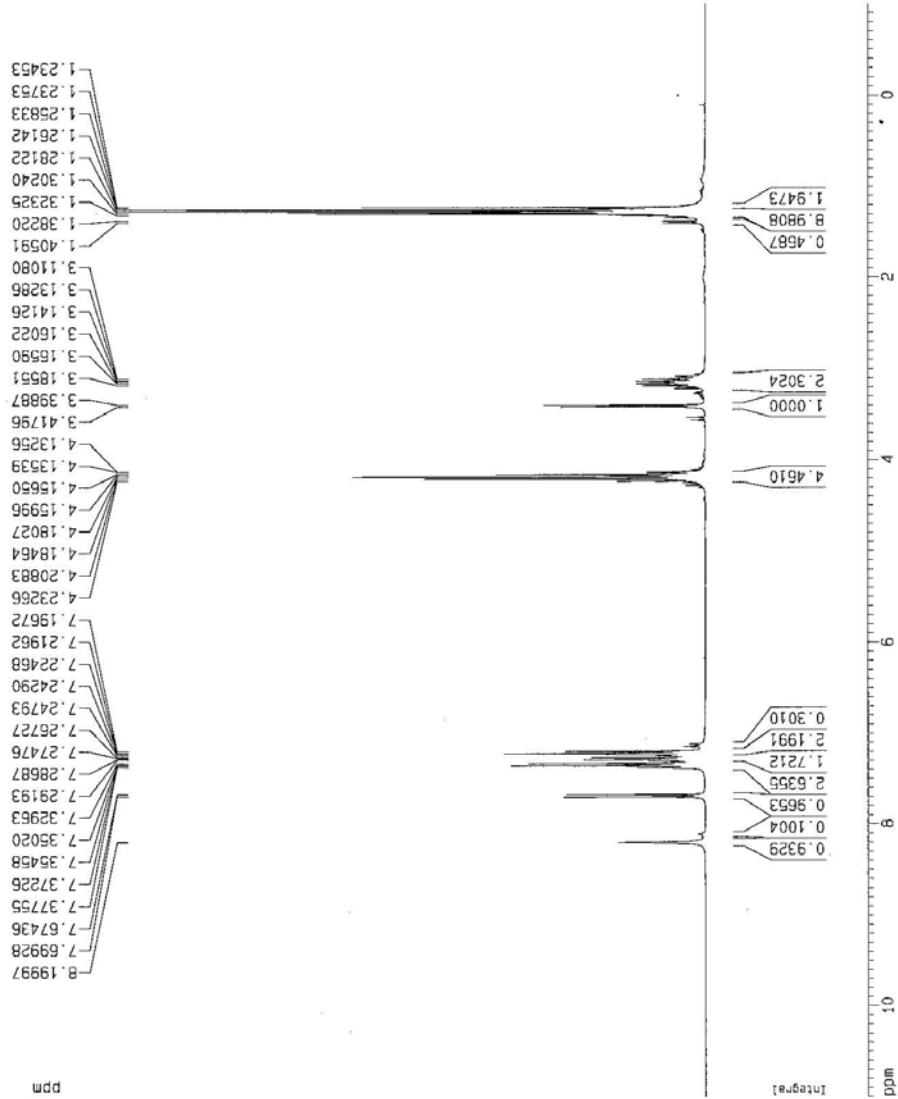

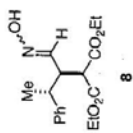

AW-1-102

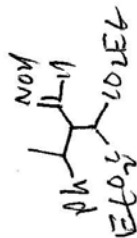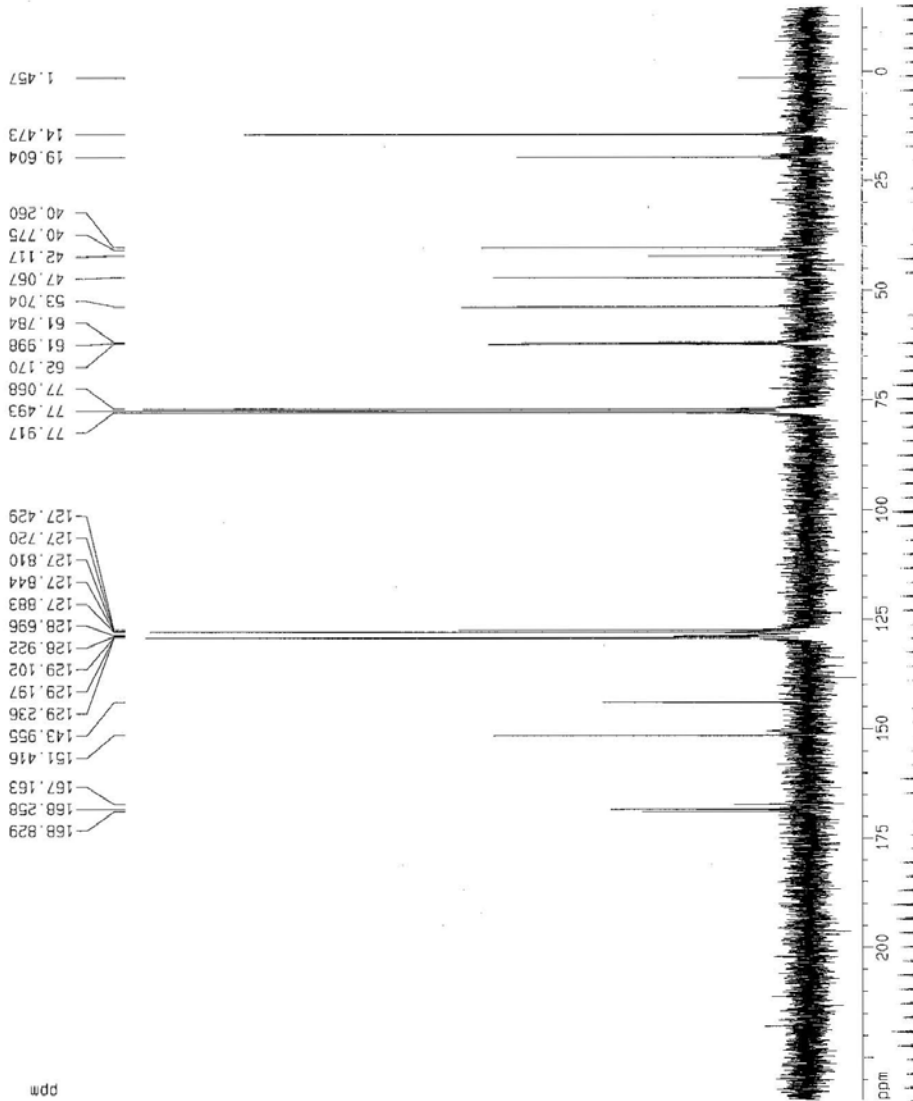

Current Data Parameters  
 NAME JAW-1-102  
 EXPNO 2  
 PROCNO 1

F2 - Acquisition Parameters  
 Date\_ 20091024  
 Time 21.56  
 INSTRUM spect  
 PROBHD 5 mm QNP 1H/1  
 PULPROG zgpg30  
 TD 16384  
 SOLVENT CDCl3  
 NS 1024  
 DS 4  
 SWH 18756.952 Hz  
 FIDRES 1.147277 Hz  
 AQ 0.4359544 sec  
 RG 32768  
 DM 25.600 usec  
 DE 8.00 usec  
 TE 300.0 K  
 D1 2.00000000 sec  
 D11 0.03000000 sec  
 D12 0.00002000 sec

\*\*\*\*\* CHANNEL f1 \*\*\*\*\*  
 NUC1 13C  
 P1 5.40 usec  
 PL1 -6.00 dB  
 SF01 75.406357 MHz

\*\*\*\*\* CHANNEL f2 \*\*\*\*\*  
 CPDPRG2 waltz16  
 NUC2 1H  
 PCPR2 115.00 usec  
 PL2 0.00 dB  
 PL12 20.00 dB  
 PL13 20.00 dB  
 SF02 298.8711925 MHz

F2 - Processing parameters  
 SI 32768  
 SF 75.4023410 MHz  
 K0M 0  
 SSB 0  
 LB 0.00 Hz  
 GB 0  
 PC 1.40

1D NMR plot parameters  
 CX 20.00 cm  
 F1P 234.651 ppm  
 F1 17693.24 Hz  
 F2P -14.639 ppm  
 F2 -1103.75 Hz  
 PPKCK 12.45446 ppm/cm  
 NZCM 939.84957 Hz/cm

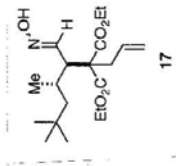

after column  
16-20

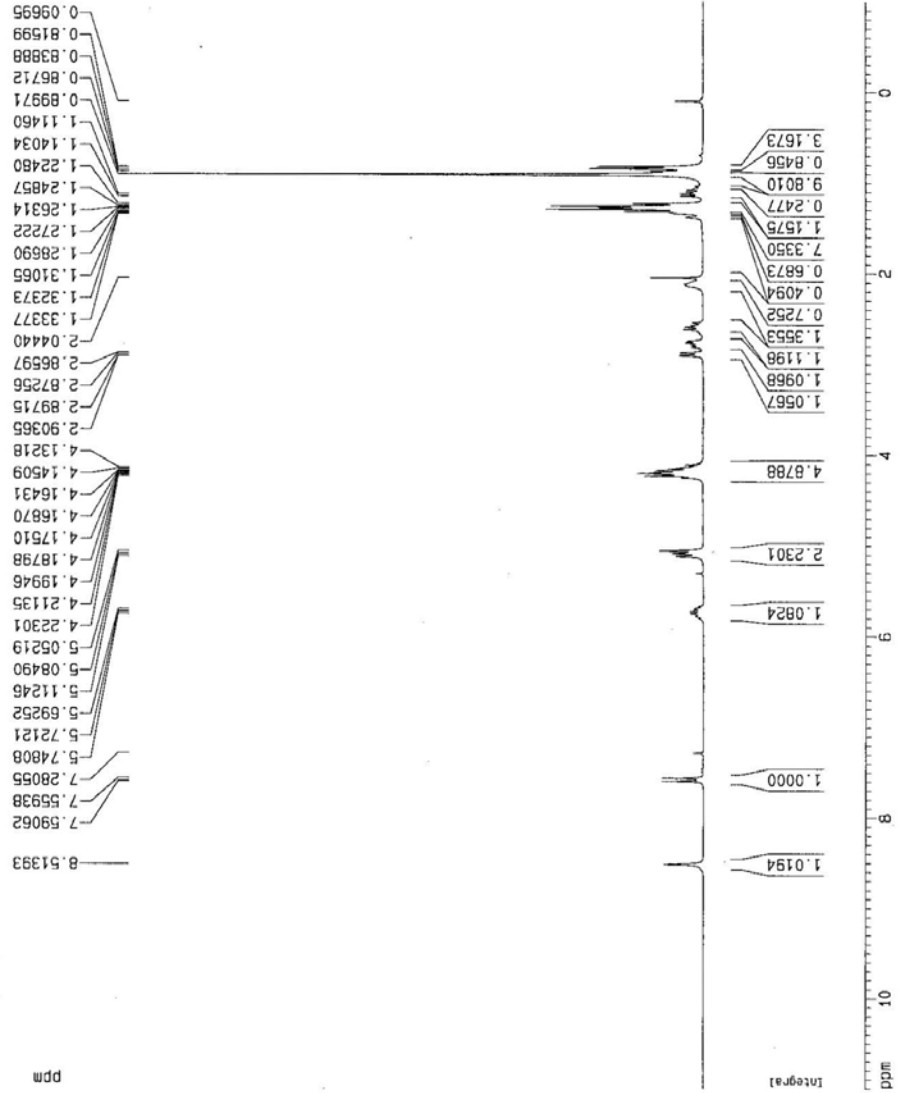

Current Data Parameters  
 NAME jaw-2-082  
 EXPNO 1  
 PROCNO 1

F2 - Acquisition Parameters  
 Date\_ 20100907  
 Time\_ 15.37  
 INSTRUM spect  
 PROBHD 5 mm Multind  
 PULPROG zg30  
 TD 24690  
 SOLVENT CDCl3  
 NS 16  
 DS 2  
 SWH 6172.639 Hz  
 FIDRES 0.250014 Hz  
 AQ 1.9999400 sec  
 RG 101.6  
 DM 81.000 usec  
 DE 6.00 usec  
 TE 300.0 K  
 D1 1.00000000 sec

\*\*\*\*\* CHANNEL f1 \*\*\*\*\*  
 NUC1 1H  
 P1 9.60 usec  
 PL1 -6.00 dB  
 SF01 300.1318534 MHz

F2 - Processing parameters  
 SI 32785  
 SF 300.1300000 MHz  
 MDW no  
 SSB 0  
 LB 0.00 Hz  
 GB 0  
 PC 1.00

1D NMR plot parameters  
 CX 20.00 cm  
 F1P 11.000 ppm  
 F1 3501.43 Hz  
 F2P -1.000 ppm  
 F2 -300.13 Hz  
 PPMCM 0.60000 ppm/cm  
 HZCM 180.07800 Hz/cm

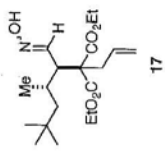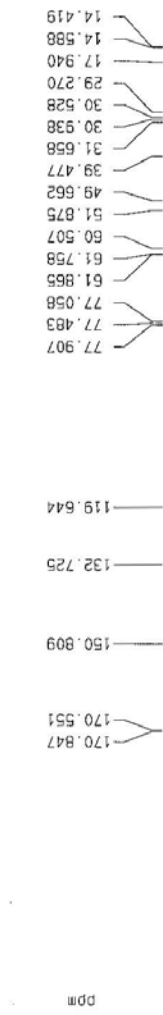

Current Data Parameters  
 NAME Jan-2-082  
 EXPNO 2  
 PROCNO 1

F2 - Acquisition Parameters  
 Date\_ 20100609  
 Time 21.52  
 INSTRUM spect  
 PROBHD 5 mm DNP 1H/1  
 PULPROG zgpg30  
 TD 32768  
 SOLVENT CDCl3  
 NS 1441  
 DS 4  
 SWH 18796.992 Hz  
 FIDRES 0.573639 Hz  
 AQ 0.8716788 sec  
 RG 4096  
 DM 26.600 usec  
 DE 6.00 usec  
 TE 300.0 K  
 D1 2.0000000 sec  
 D11 0.0500000 sec  
 D12 0.0900000 sec

\*\*\*\*\* CHANNEL f1 \*\*\*\*\*  
 NUC1 13C  
 P1 5.40 usec  
 PL1 -6.00 dB  
 SF01 75.4106357 MHz

\*\*\*\*\* CHANNEL f2 \*\*\*\*\*  
 CPDPRG2 waltz16  
 NUC2 1H  
 PCPD02 115.00 usec  
 PL2 0.00 dB  
 PL12 20.00 dB  
 PL13 20.00 dB  
 SF02 299.8711995 MHz

F2 - Processing parameters  
 SI 32768  
 SF 75.4023410 MHz  
 WDW EM  
 SSB 0  
 LB 1.00 Hz  
 GB 0  
 PC 1.40

ID MRB plot parameters  
 CX 20.00 cm  
 FIP 234.651 ppm  
 F1 17693.24 Hz  
 F2 -14.638 ppm  
 F3 -103.75 Hz  
 PWDW 12.46446 ppm/cm  
 HZD 9.91997 Hz/cm

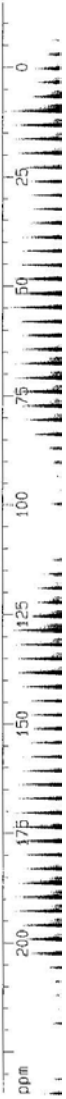



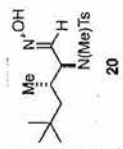

General  
 DATE = 2010/09/15  
 TIME = 22:27  
 INSTRUM = spect  
 PULPROG = zg30  
 F1 (1H)  
 SI = 32768  
 SF = 360.13  
 SFO = 7440.476

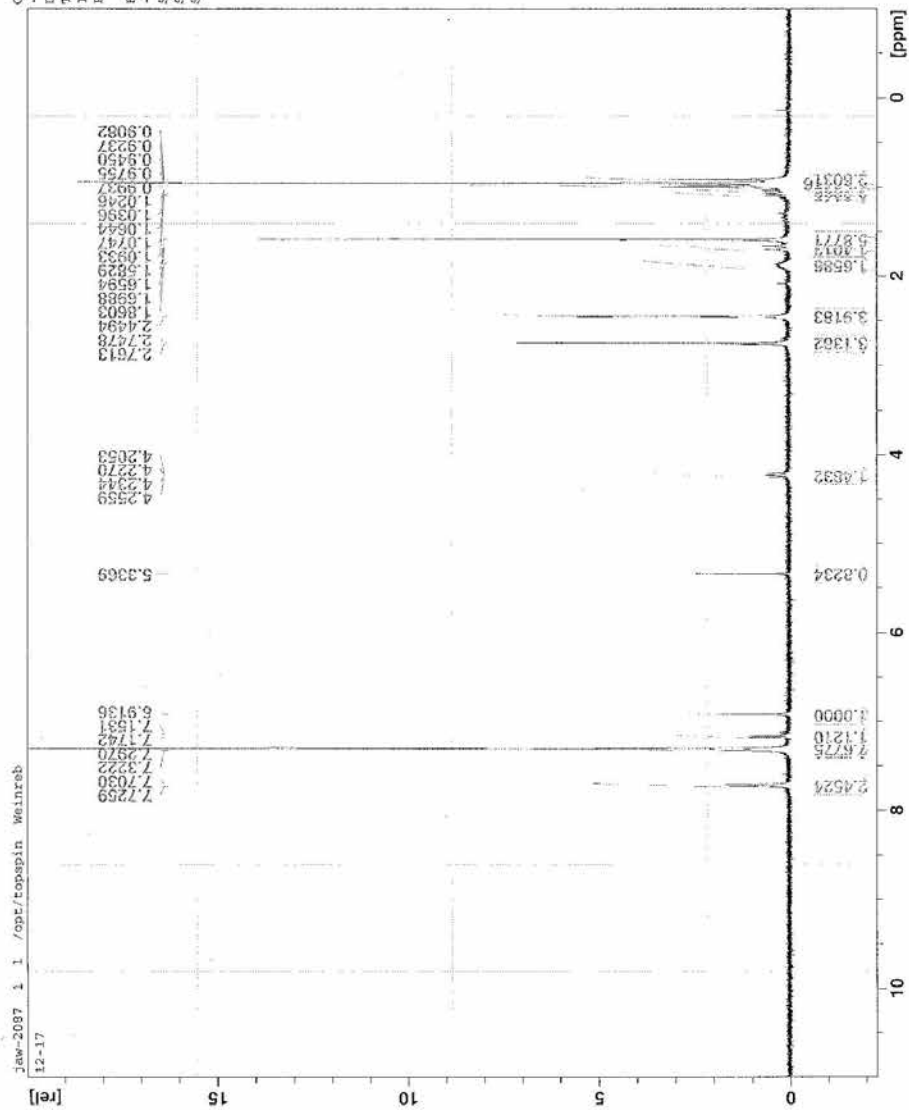

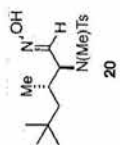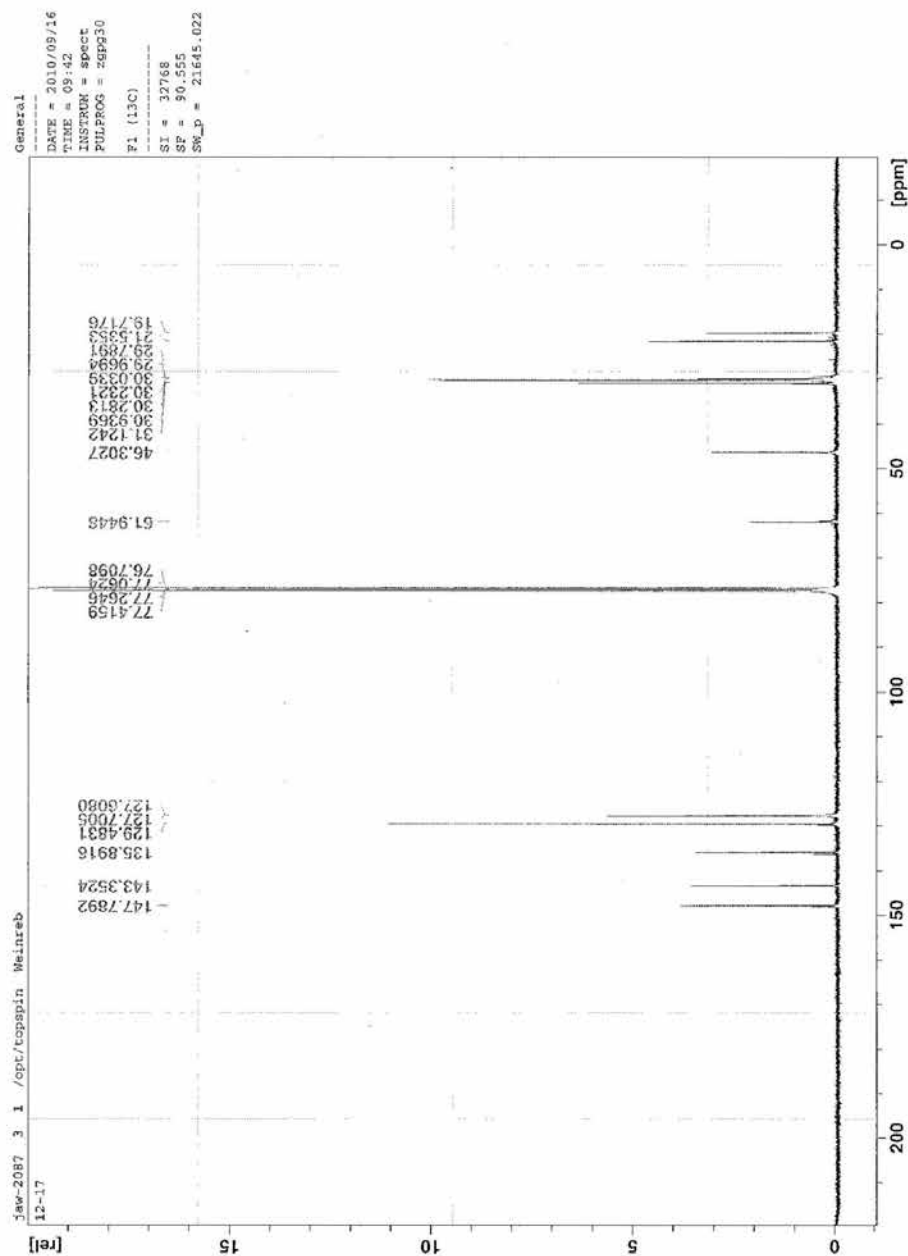

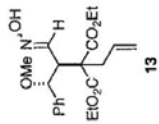

Current Data Parameters  
 NAME JAN-2-035  
 EXPNO 2  
 PROCNO 1

F2 - Acquisition Parameters  
 Date\_ 20100703  
 Time 17.39  
 INSTRUM spect  
 PROBHD 5 mm QNP 1H/1  
 PULPROG zg30  
 TD 24690  
 SOLVENT CDCl3  
 NS 16  
 DS 2  
 SWH 6172.939 Hz  
 FIDRES 0.250014 Hz  
 AQ 1.9999400 sec  
 RG 128  
 DW 81.000 usec  
 DE 6.00 usec  
 TE 300.0 K  
 D1 1.0000000 sec

\*\*\*\*\* CHANNEL f1 \*\*\*\*\*  
 NUC1 1H  
 P1 11.70 usec  
 PL1 0.00 dB  
 SF01 299.8718518 MHz

F2 - Processing parameters  
 SI 32768  
 SF 299.8700000 MHz  
 MDN no  
 SSB 0  
 LB 0.00 Hz  
 GB 0  
 PC 1.00

1D NMR plot parameters  
 CX 20.00 cm  
 F1P 11.000 ppm  
 F1 3289.57 Hz  
 F2P -1.000 ppm  
 F2 -269.87 Hz  
 PRCK 0.60000 ppm/cm  
 HZDN 179.92200 Hz/cm

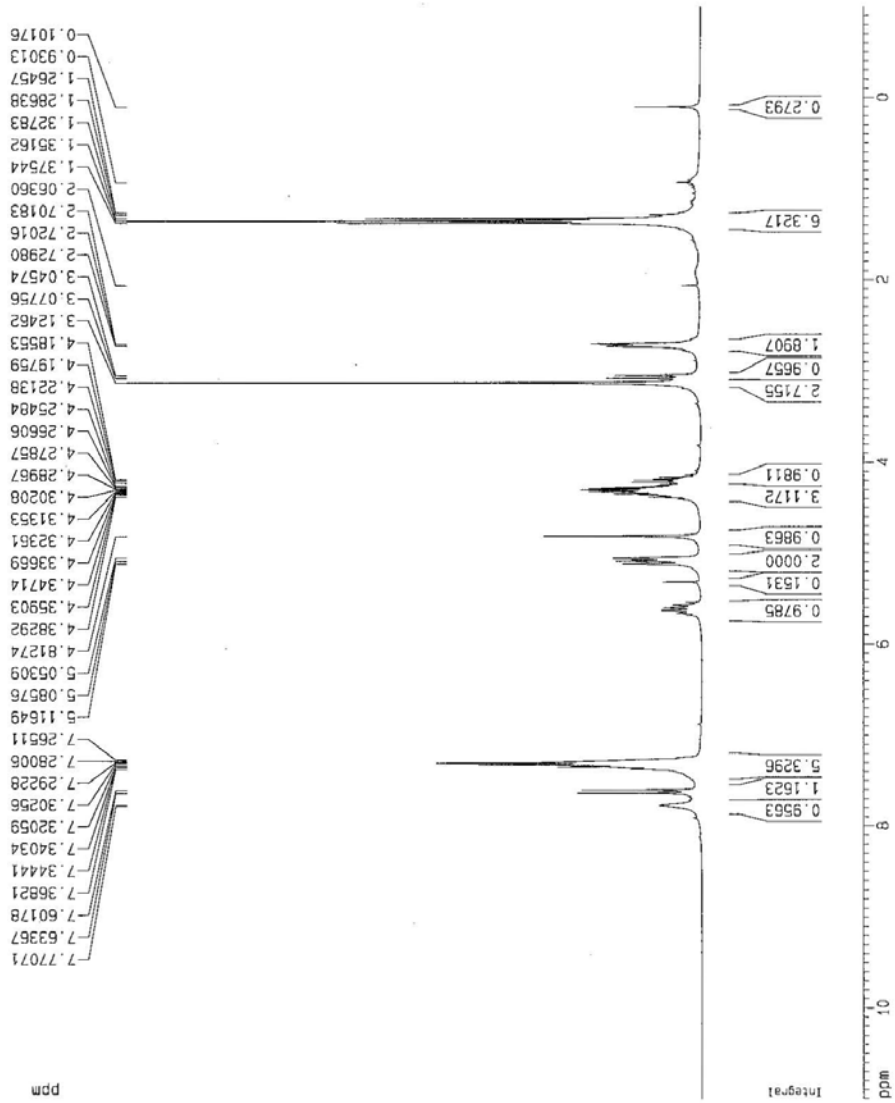

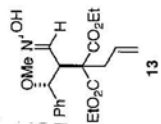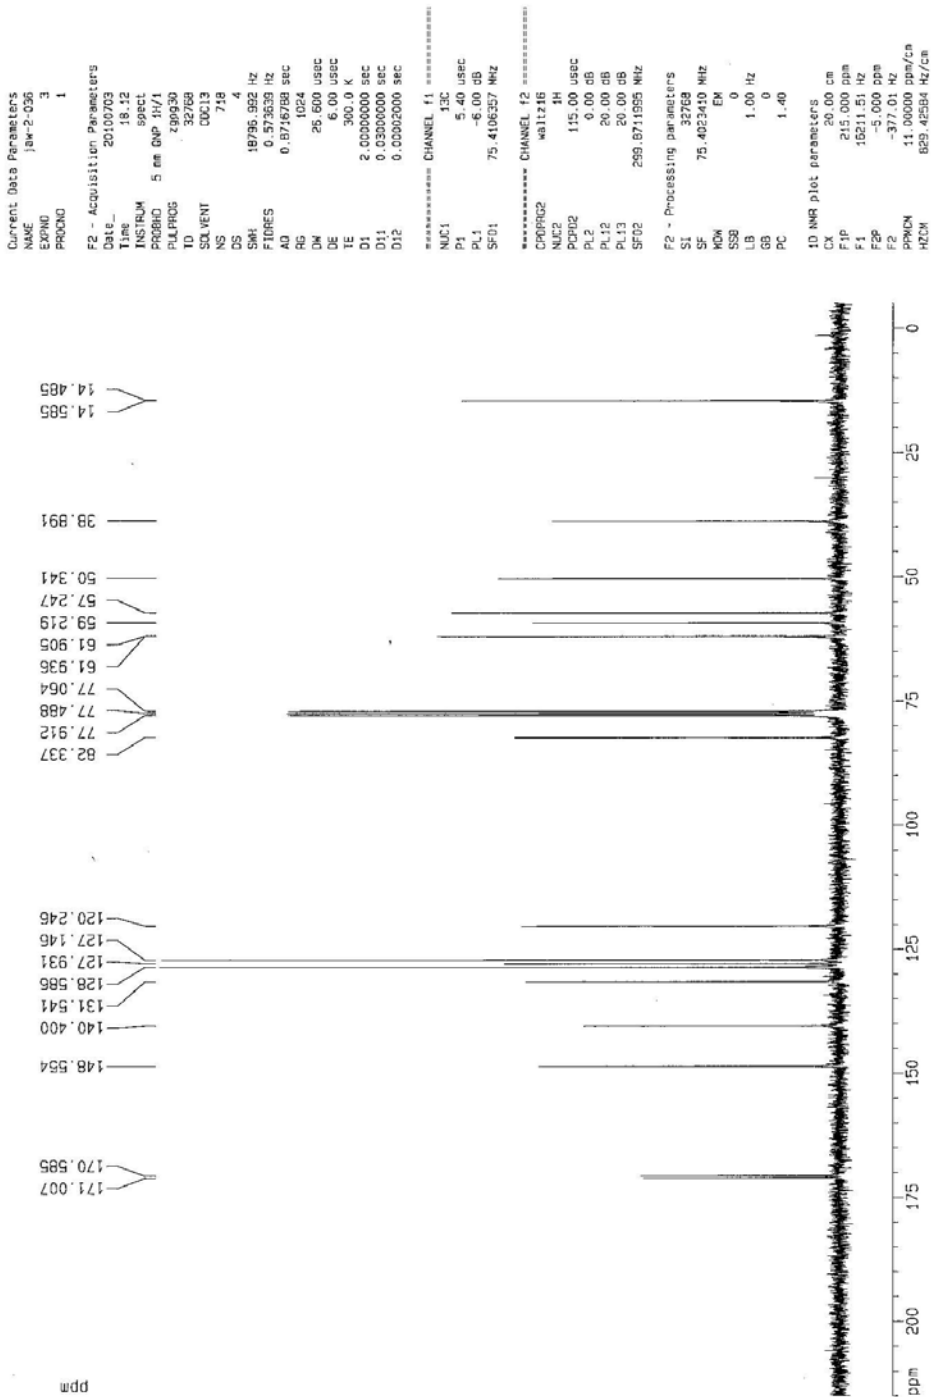

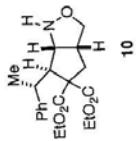

after column  
26-33

Current Data Parameters  
 NAME jak-1-156  
 EXPNO 2  
 PROCNO 1

F2 - Acquisition Parameters  
 Date\_ 2010130  
 Time 22.41  
 INSTRUM spect  
 PROBHD 5 mm QNP 1H/1  
 PULPROG zg30  
 TD 24590  
 SOLVENT CDCl3  
 NS 16  
 DS 2  
 SWH 5172.833 Hz  
 FIDRES 0.250014 Hz  
 AQ 1.9999400 sec  
 RG 143.7  
 DM 81.000 usec  
 DE 6.00 usec  
 TE 300.0 K  
 D1 1.00000000 sec

\*\*\*\*\* CHANNEL f1 \*\*\*\*\*  
 NUC1 1H  
 P1 11.70 usec  
 PL1 0.00 dB  
 SF01 299.8718518 MHz

F2 - Processing parameters  
 SI 32768  
 SF 299.8700000 MHz  
 WDW no  
 SSB 0  
 LB 0.00 Hz  
 GB 0  
 PC 1.00

1D NMR plot parameters  
 CX 20.00 cm  
 FIP 11.000 ppm  
 F1 3288.57 Hz  
 F2 -1.000 ppm  
 FZ 268.67 Hz  
 PRNOM 0.60000 ppm/cm  
 HZCM 179.36200 Hz/cm

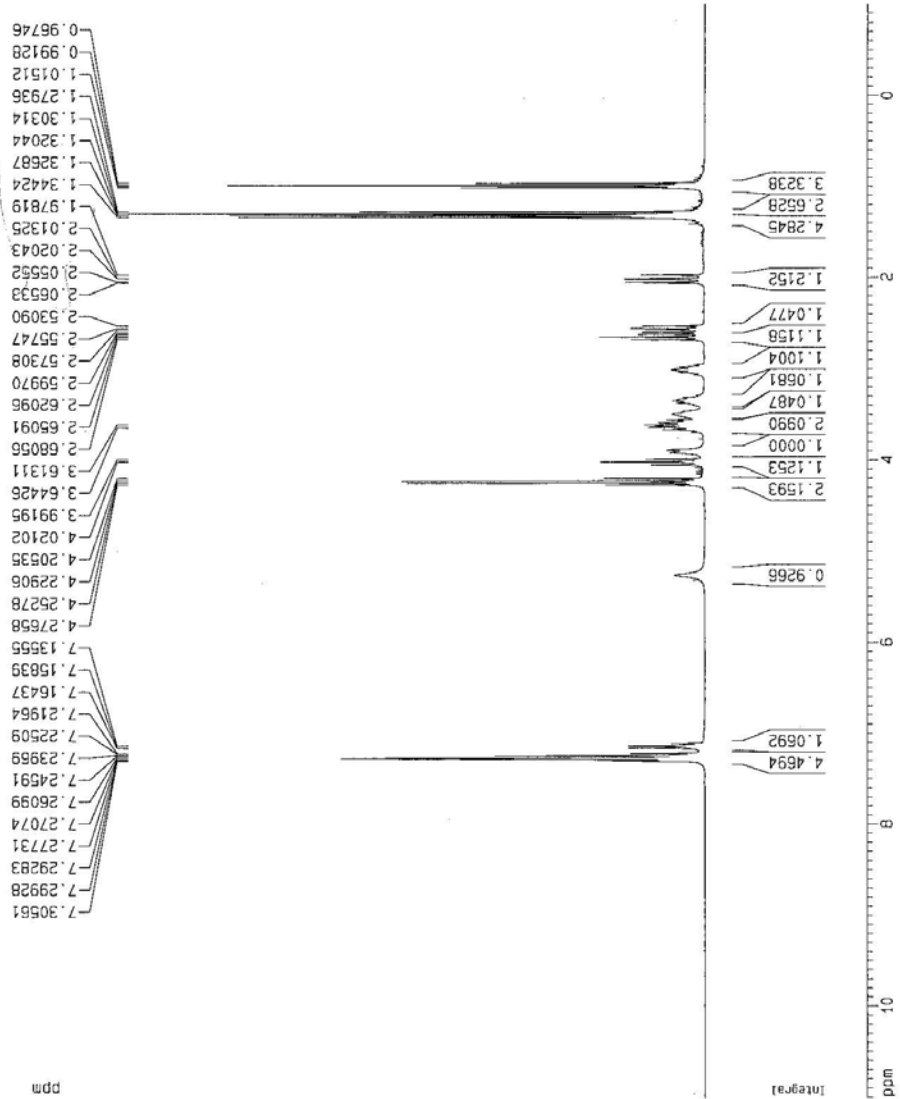

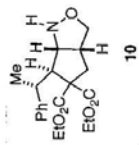

10

Current Data Parameters  
 NAME JAW-1-158  
 EXPNO 2  
 PROCNO 1

F2 - Acquisition Parameters  
 Date\_ 20100204  
 Time 22.45  
 INSTRUM spect  
 PROBHD 5 mm BBI 1H-8  
 PULPROG zgpg30  
 TD 65535  
 SOLVENT CDCl<sub>3</sub>  
 NS 1024  
 DS 4  
 SMH 25125.629 Hz  
 FIDRES 0.383387 Hz

R6 16384  
 QM 15.900 usec  
 DE 6.00 usec  
 TE 300.0 K  
 D1 2.00000000 sec  
 d11 0.03000000 sec  
 d12 0.00000000 sec

\*\*\*\*\* CHANNEL f1 \*\*\*\*\*  
 NUC1 <sup>13</sup>C  
 P1 16.35 usec  
 PL1 -5.00 dB  
 SFO1 100.6237959 MHz

\*\*\*\*\* CHANNEL f2 \*\*\*\*\*  
 CPDPRG2 waltz16  
 NUC2 <sup>1</sup>H  
 PCPD2 114.00 usec  
 PL2 0.00 dB  
 PL12 24.00 dB  
 PL13 24.00 dB  
 SFO2 400.1316005 MHz

F2 - Processing parameters  
 SI 32768  
 SF 100.6127290 MHz  
 WDK EM  
 SSB 0  
 LB 1.00 Hz  
 GB 0  
 PC 1.40

10 NMR plot parameters  
 CX 20.00 cm  
 F1P 234.858 ppm  
 F1 23629.72 Hz  
 F2P -14.868 ppm  
 F2 -1495.90 Hz  
 PPMCM 12.48631 ppm/cm  
 HZCM 1256.28137 Hz/cm

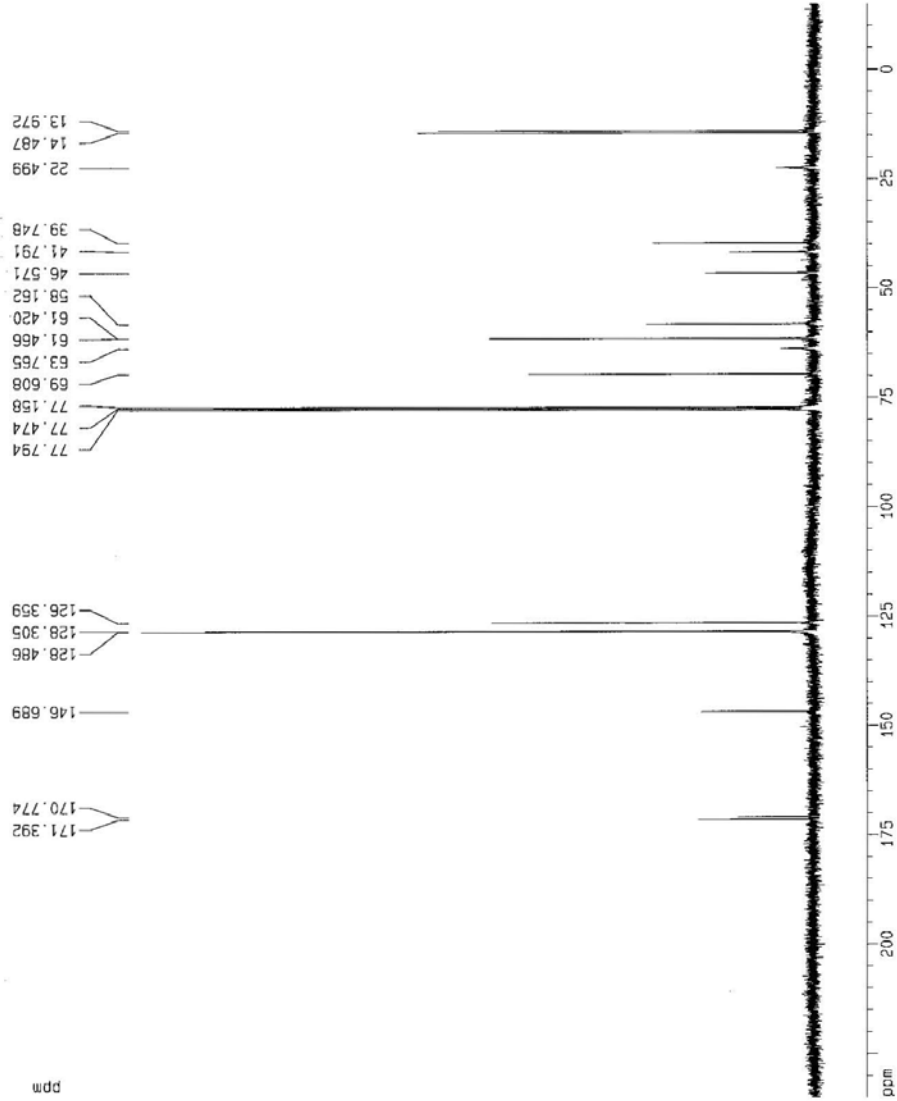

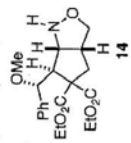

jaw-2-037 1 1 /opt/topspin Meinreb

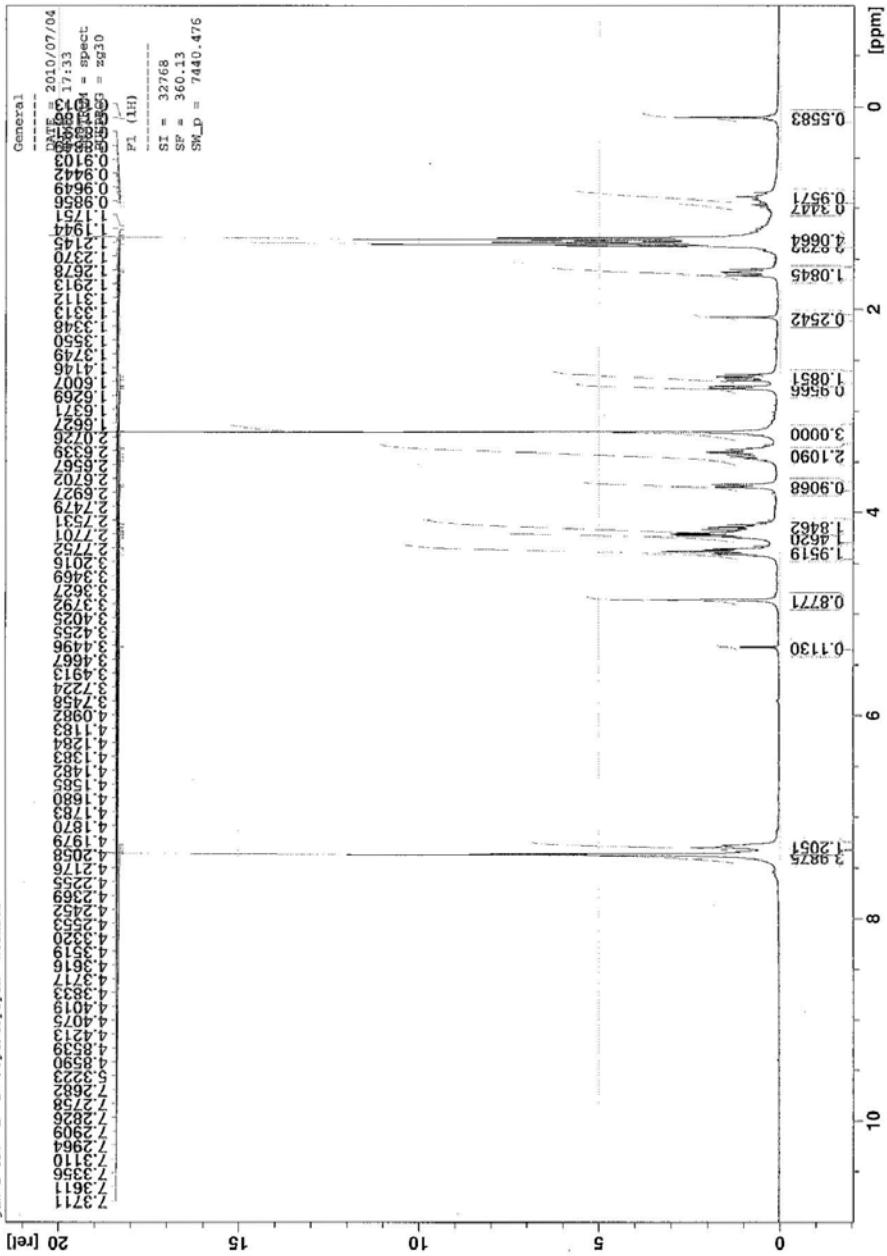

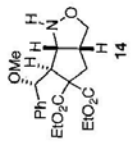

14

Jaw-2-037 2 1 /opt/topspin Weinreb

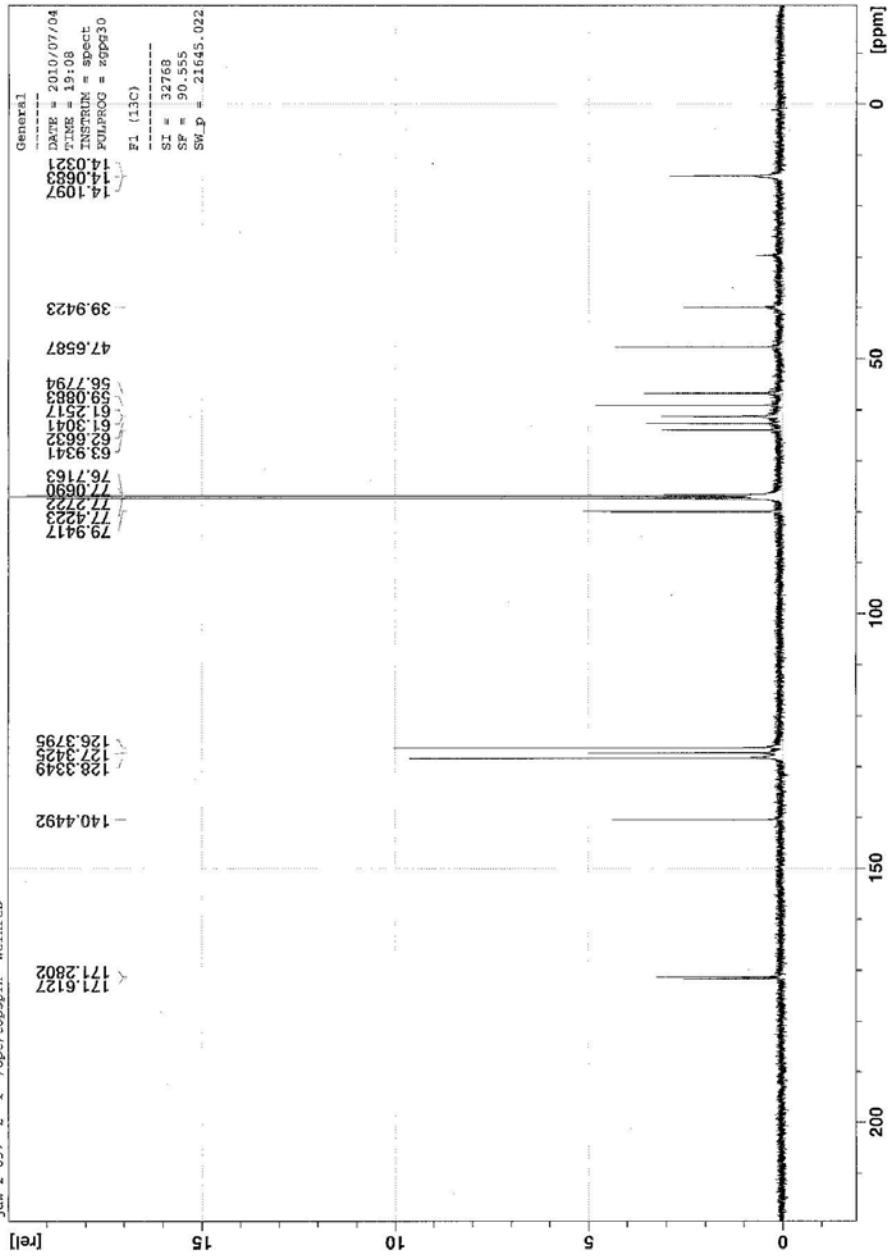



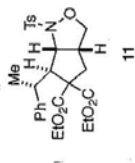

after column

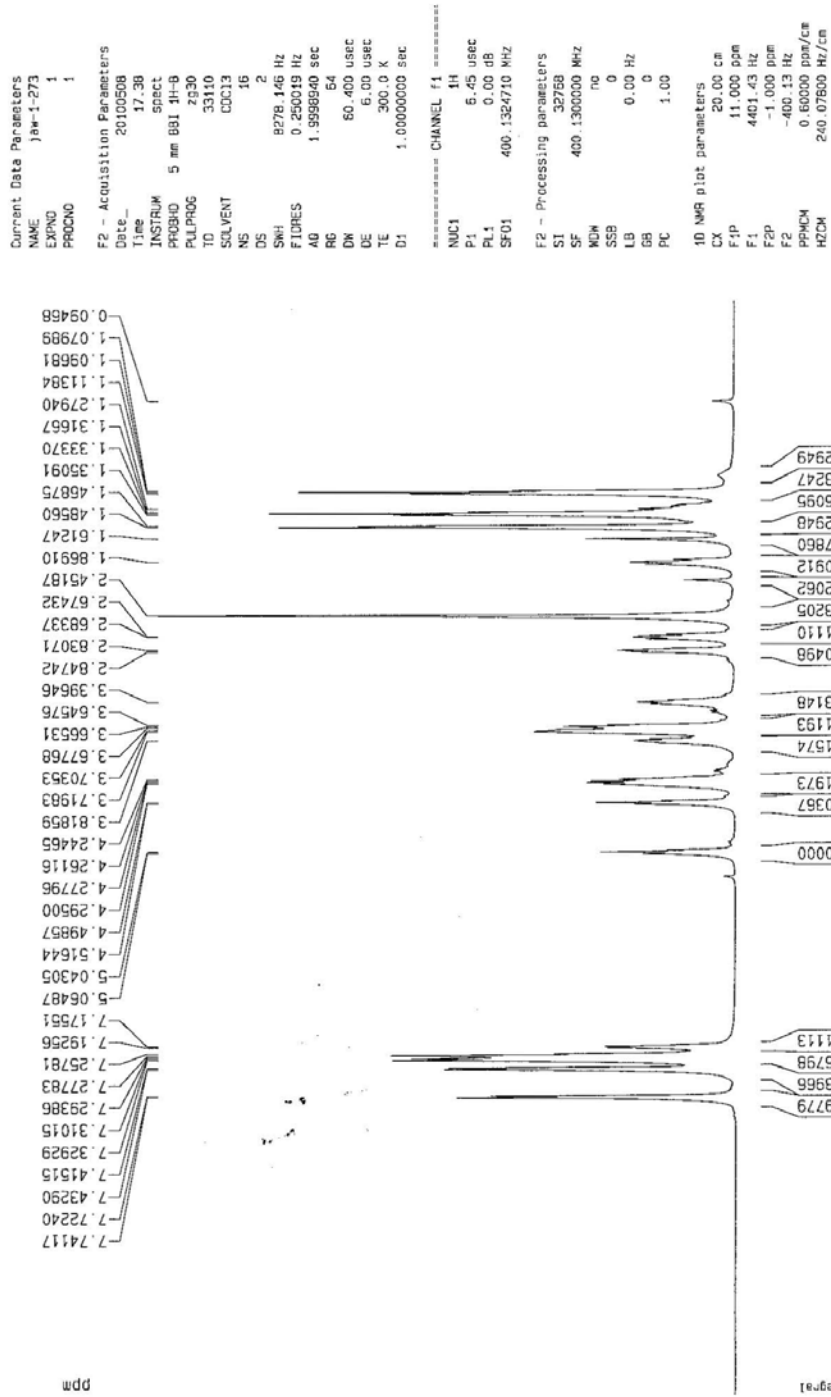

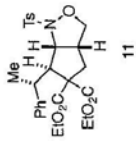

after column

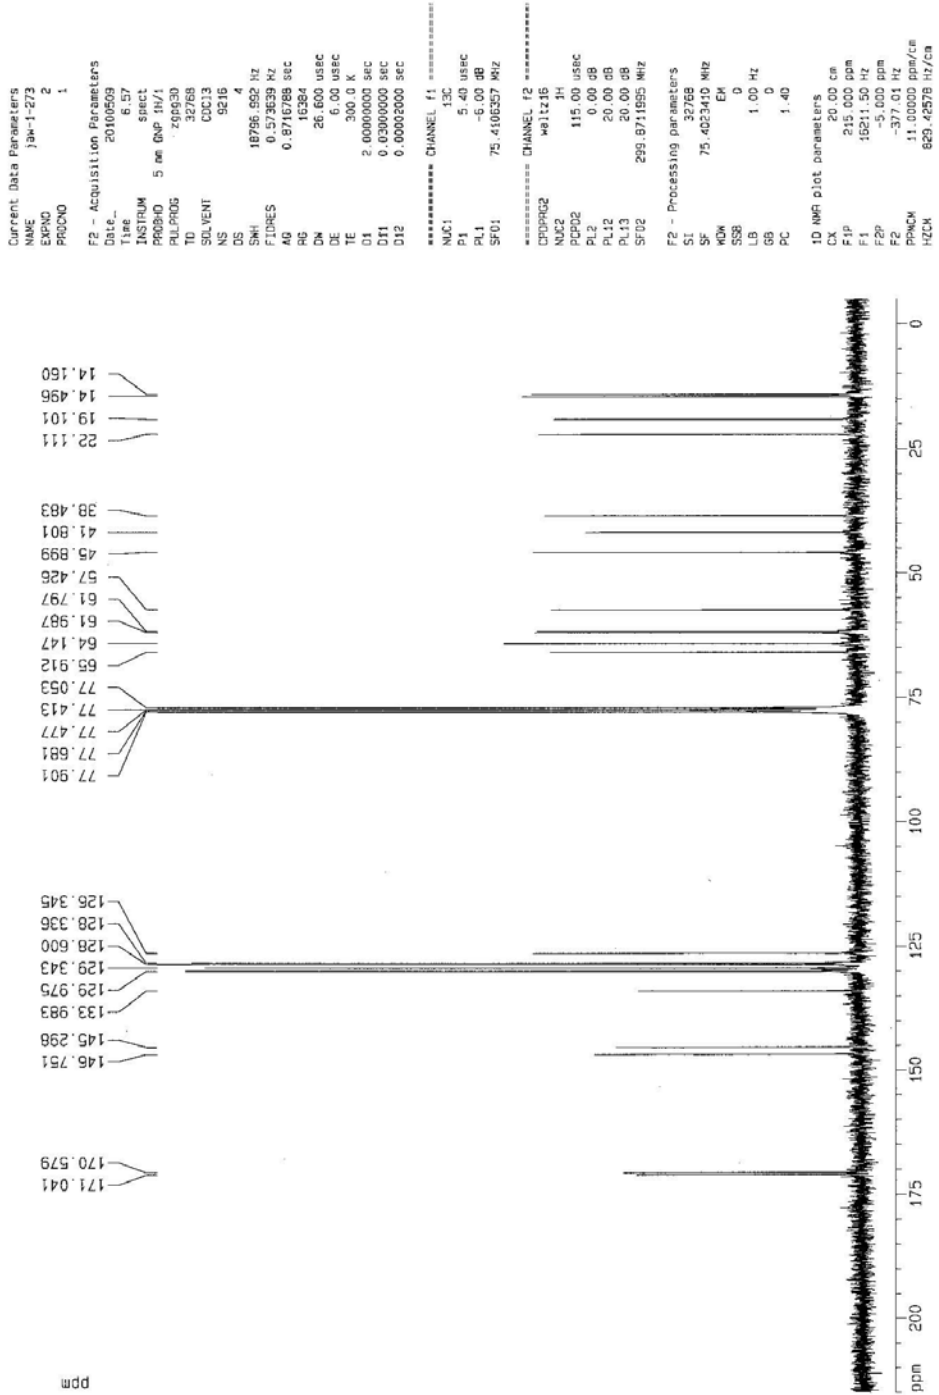

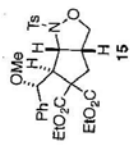

after column  
10-15

Current Data Parameters  
 NAME jmk-2-039  
 EXPNO 1  
 PROCNO 1

F2 - Acquisition Parameters  
 Date\_ 20100706  
 Time 15.40  
 INSTRUM spect  
 PROBHD 5 mm QNP 1H/1  
 PULPROG zg30  
 TD 24690  
 SOLVENT CDCl3  
 NS 16  
 DS 2  
 SWH 6172.839 Hz  
 FIDRES 0.250014 Hz  
 AQ 1.8989400 sec  
 RG 203.2  
 DW 81.000 usec  
 DE 6.00 usec  
 TE 300.0 K  
 D1 1.00000000 sec

\*\*\*\*\* CHANNEL f1 \*\*\*\*\*  
 NUC1 1H  
 P1 11.70 usec  
 PL1 0.00 dB  
 SF01 299.8718518 MHz

F2 - Processing parameters  
 SI 32758  
 SF 299.8700000 MHz  
 KM no  
 SSB 0  
 LB 0.00 Hz  
 GB 0  
 PC 1.00

1D NMR plot parameters  
 CX 20.00 cm  
 FIP 11.000 ppm  
 F1 3288.57 Hz  
 F2 -1.000 ppm  
 F2 -289.87 Hz  
 FWHM 0.60000 ppm/cm  
 HZCM 179.92200 Hz/cm

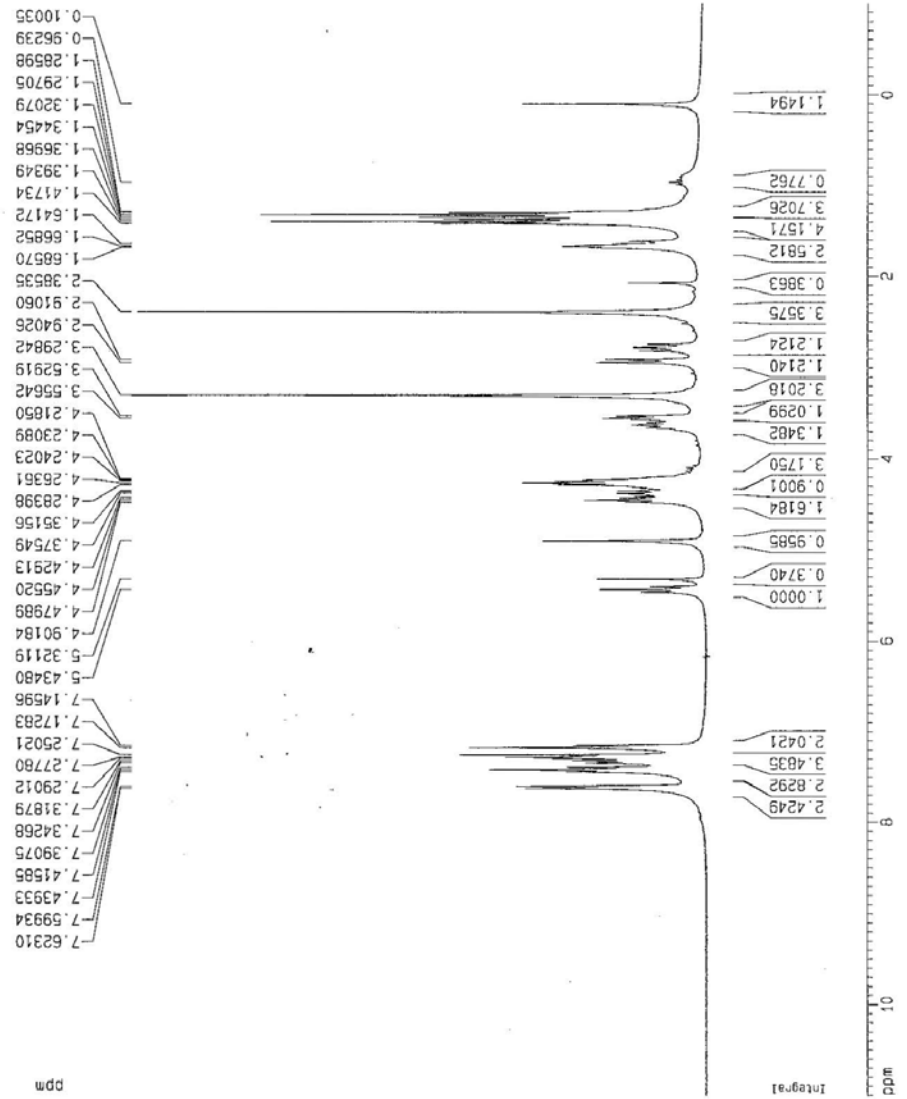

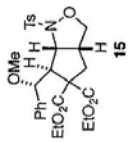

Current Data Parameters  
 NAME Jia-1-039  
 EXPNO 2  
 PROCNO 1

F2 - Acquisition Parameters  
 Date\_ 20100707  
 Time 8.05  
 INSTRUM spect  
 PROBU0 5 mm QNP 1H/1  
 PULPROG zgpg30  
 TD 32768  
 SOLVENT CDCl3  
 NS 12288  
 DS 4

SMH 16795.952 Hz  
 FIDRES 0.577639 Hz  
 AQ 0.8716788 sec  
 RG 1024  
 DM 26.600 usec  
 DE 6.00 usec  
 TE 300.0 K  
 D1 2.00000000 sec  
 D11 0.03000000 sec  
 D12 0.00002000 sec

\*\*\*\*\* CHANNEL f1 \*\*\*\*\*  
 NUC1 13C  
 P1 5.40 usec  
 PL1 -6.00 dB  
 SF01 75.4106357 MHz

\*\*\*\*\* CHANNEL f2 \*\*\*\*\*  
 CPDPRG2 HLLZ15  
 NUC2 1H  
 PCPD2 115.00 usec  
 PL2 0.00 dB  
 PL12 20.00 dB  
 PL13 20.00 dB  
 SF02 299.6711955 MHz

F2 - Processing parameters  
 SI 32768  
 SF 75.4623410 MHz  
 KW EM  
 SSW 0  
 LB 1.00 Hz  
 GB 0  
 PC 1.40

1D NMR plot parameters  
 CX 20.00 ca  
 F1P 234.651 ppm  
 F1 17693.24 Hz  
 F2P -14.638 ppm  
 F2 -1103.75 Hz  
 PPMCM 12.46446 ppm/ca  
 HZCM 938.84955 Hz/ca

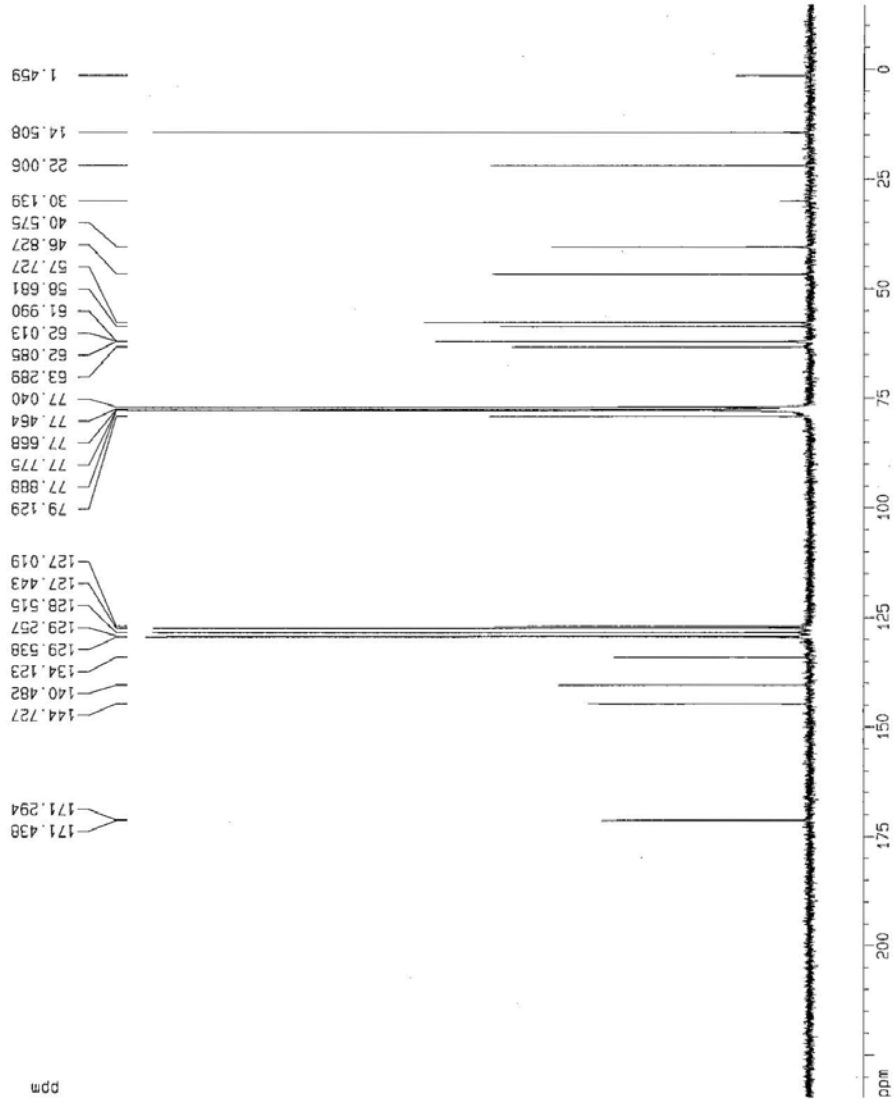

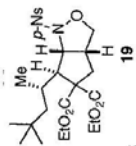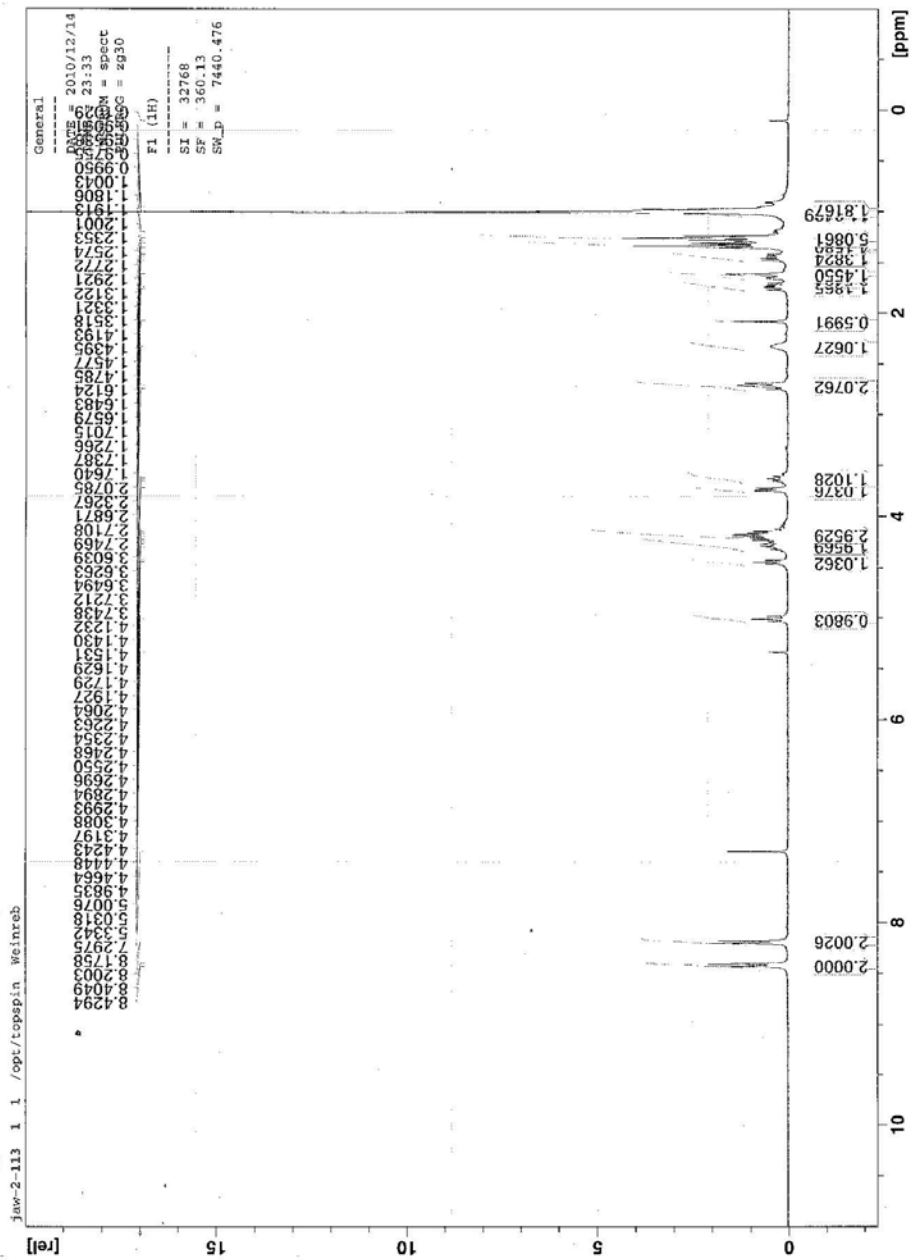

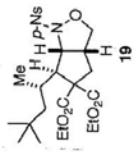

jaw-2-113 2 1 /opr/topspin Weinreb

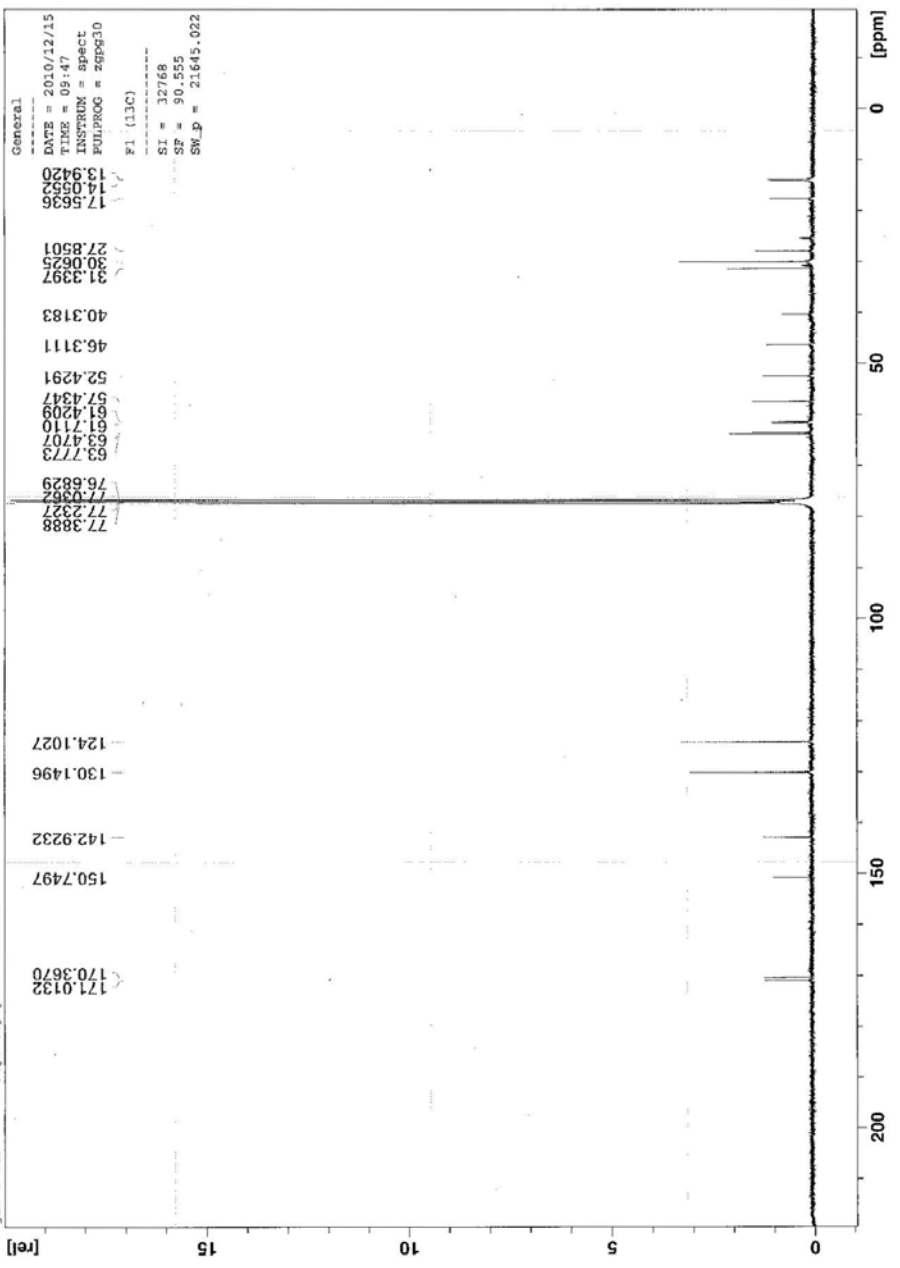

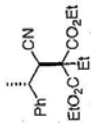

Current Data Parameters  
 NAME jw-2-115  
 EXPNO 2  
 PROCNO 1

F2 - Acquisition Parameters  
 Date\_ 20121218  
 Time 10.32  
 INSTRUM spect  
 PROBHD 5 mm QNP 1H/1  
 PULPROG zg30  
 TD 24690  
 SOLVENT CUC13  
 NS 16  
 DS 2  
 SWH 6172.839 Hz  
 FIDRES 0.2560014 Hz  
 AQ 1.9989400 sec  
 RG 203.2  
 DM 81.000 usec  
 DE 6.00 usec  
 TE 300.0 K  
 D1 1.00000000 sec

===== CHANNEL f1 =====  
 NUC1 1H  
 P1 11.70 usec  
 PL1 0.00 dB  
 SF01 299.8716518 MHz

F2 - Processing parameters  
 SI 32758  
 SF 299.8700000 MHz  
 WDW no  
 SSB 0  
 LB 0.00 Hz  
 GB 0  
 PC 1.00

1D NMR plot parameters  
 CX 20.00 cm  
 FIP 11.000 ppm  
 F1 3288.57 Hz  
 F2 -2891.87 Hz  
 PPMCM 0.60000 ppm/cm  
 HZCM 179.98200 Hz/cm

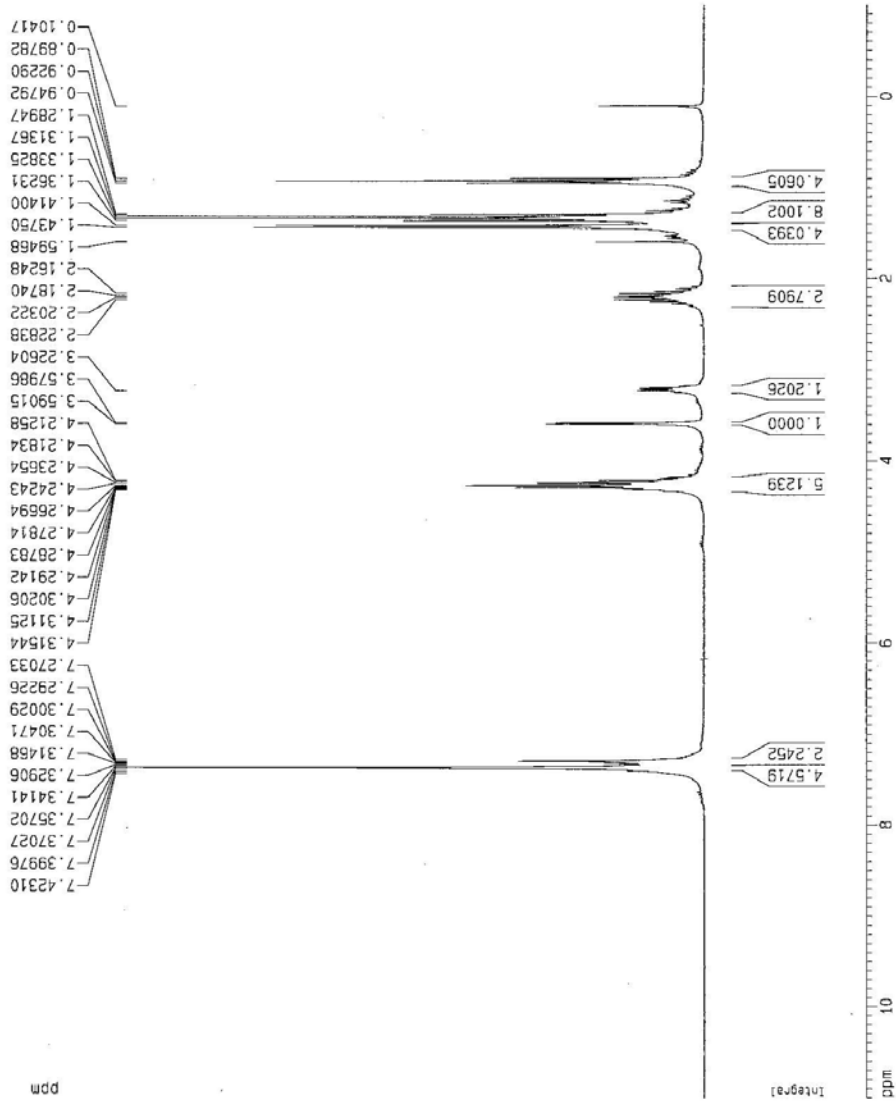

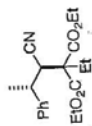

Current Data Parameters  
 NAME J08-2-115  
 EXPNO 3  
 PROCNO 1

F2 - Acquisition Parameters  
 Date\_ 2010.12.18  
 Time 10.36  
 INSTRUM spect  
 PULPROG 5 mm DNP sH/1  
 PL1PROG zgpg30  
 TD 32768  
 SOLVENT CDCl3  
 NS 2288  
 DS 4  
 SWH 18796.592 Hz  
 FIDRES 0.572639 Hz  
 AQ 0.8716768 sec  
 RG 3251  
 DM 28.800 usec  
 DE 6.00 usec  
 TE 300.0 K  
 D1 2.0000000 sec  
 D11 0.0300000 sec  
 D12 0.0000200 sec

\*\*\*\*\* CHANNEL f1 \*\*\*\*\*  
 NUC1 13C  
 P1 5.40 usec  
 PL1 -6.00 dB  
 SF01 75.4106357 MHz

\*\*\*\*\* CHANNEL f2 \*\*\*\*\*  
 CPDPRG2 waltz16  
 NUC2 1H  
 PCP02 115.00 usec  
 PL2 0.00 dB  
 PL12 20.00 dB  
 PL13 20.00 dB  
 SF02 299.8711925 MHz

F2 - Processing parameters  
 SI 32768  
 SF 75.4023410 MHz  
 WDK EM  
 SS0 0  
 LB 1.00 Hz  
 GB 0  
 PC 1.40

1D NMR plot parameters  
 CX 20.00 cm  
 F1P 234.851 ppm  
 F1 17693.24 Hz  
 F2P -14.638 ppm  
 F2 -1103.75 Hz  
 PPKCM 12.46446 ppm/cm  
 HZCM 939.84955 Hz/cm

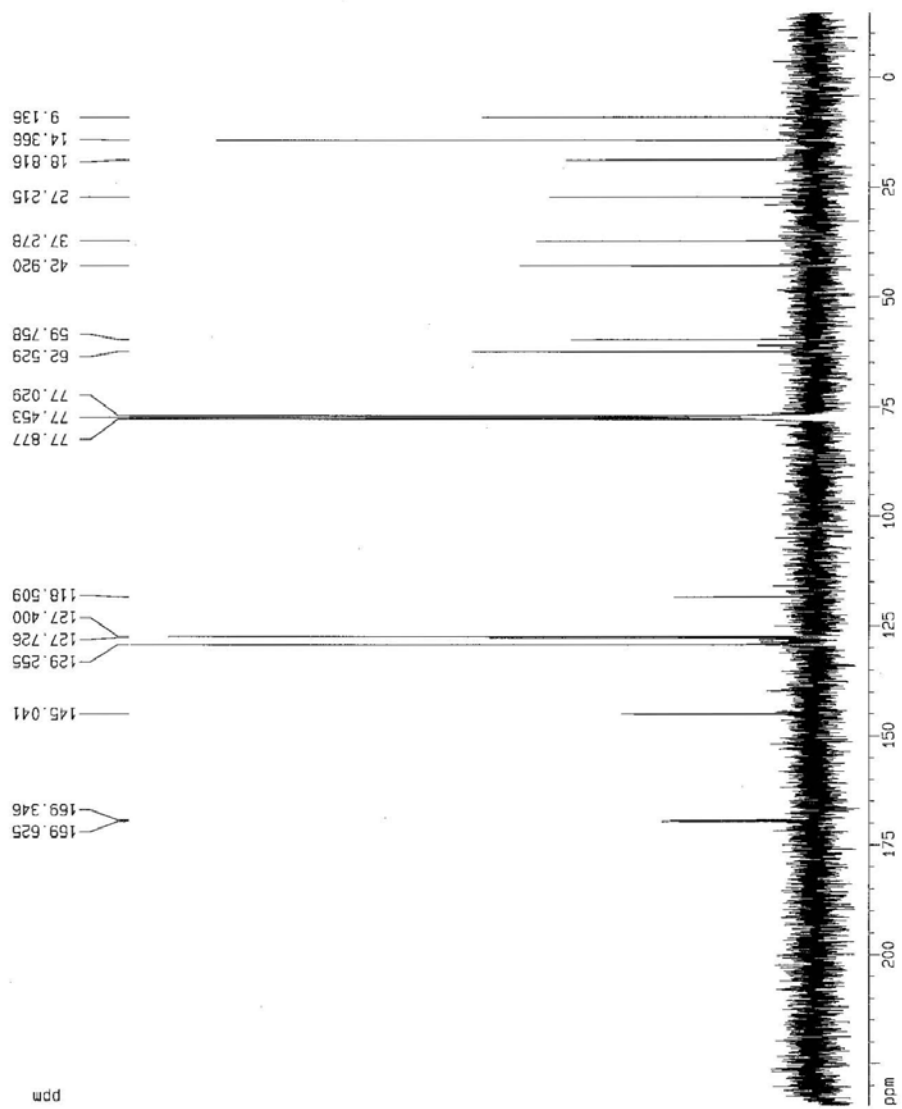



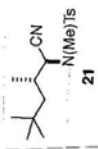

Current Data Parameters  
 NAME jak-2-107  
 EXPNO 1  
 PROCNO 1

F2 - Acquisition Parameters  
 Date\_ 20110103  
 Time 18:00  
 INSTRUM spect  
 PROBHD 5 mm GNP 1H/1  
 PULPROG zg30  
 TD 24650  
 SOLVENT CDCl3  
 NS 15  
 DS 2  
 SMH 6172.839 Hz  
 FIDRES 0.250014 Hz  
 AQ 1.959500 sec  
 RG 1149.4  
 DM 81.000 usec  
 DE 6.00 usec  
 TE 300.0 K  
 D1 1.0000000 sec

\*\*\*\*\* CHANNEL f1 \*\*\*\*\*  
 NUC1 1H  
 P1 11.70 usec  
 PL1 0.00 dB  
 SFO1 299.8718518 MHz

F2 - Processing parameters  
 SI 32768  
 SF 299.8700000 MHz  
 WDM no  
 SSB 0  
 LB 0.00 Hz  
 GB 0  
 PC 1.00

1D NMR plot parameters  
 CX 20.00 cm  
 FIP 11.000 ppm  
 F1 3298.57 Hz  
 F2 -1.000 ppm  
 PPMCK -299.87 Hz  
 HZCM 0.50000 ppm/cm  
 179.92200 Hz/cm

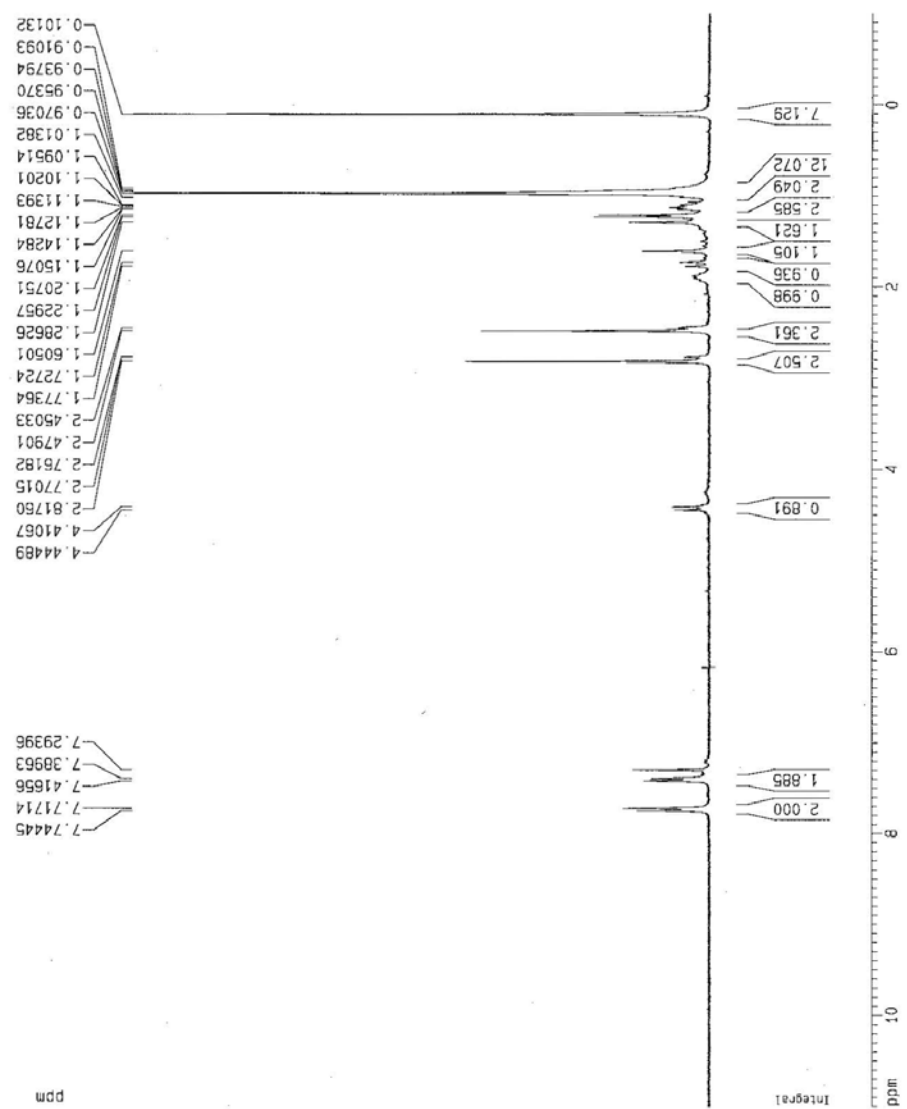

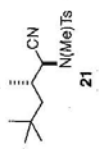

Current Date Parameters  
 NAME Jan-2-107  
 EXPNO 2  
 PROCNO 1

F2 - Acquisition Parameters  
 Date\_ 2010107  
 Time 8.05  
 INSTRUM spect  
 PROBHD 5 mm QNP 1H/1  
 PULPROG zgpg30  
 TD 32768  
 SOLVENT CDCl3  
 NS 15624  
 DS 4  
 SWH 18796.982 Hz  
 FIDRES 0.573639 Hz  
 AQ 0.8745788 sec  
 RG 8192  
 DM 26.500 USEC  
 DE 6.00 USEC  
 TE 300.0 K  
 D1 2.0000000 sec  
 D11 0.0300000 sec  
 D12 0.0000200 sec

\*\*\*\*\* CHANNEL f1 \*\*\*\*\*  
 NUC1 13C  
 P1 5.40 usec  
 PL1 -5.00 dB  
 SFO1 75.4105357 MHz

\*\*\*\*\* CHANNEL f2 \*\*\*\*\*  
 CPDPRG2 waltz16  
 NUC2 1H  
 P2 115.00 usec  
 PL2 0.00 dB  
 PL12 20.00 dB  
 PL13 20.00 dB  
 SFO2 258.8711995 MHz

F2 - Processing parameters  
 SI 32768  
 SF 75.4023410 MHz  
 WDM 0  
 SSB 0  
 LB 1.00 Hz  
 GB 0  
 PC 1.40

1D NMR plot parameters  
 CX 20.00 cm  
 F1P 234.551 ppm  
 F1Q 17693.24 Hz  
 F2P -14.538 ppm  
 F2Q -1103.75 Hz  
 PRNCH 12.4646 cm/cm  
 HZCM 939.84867 Hz/cm

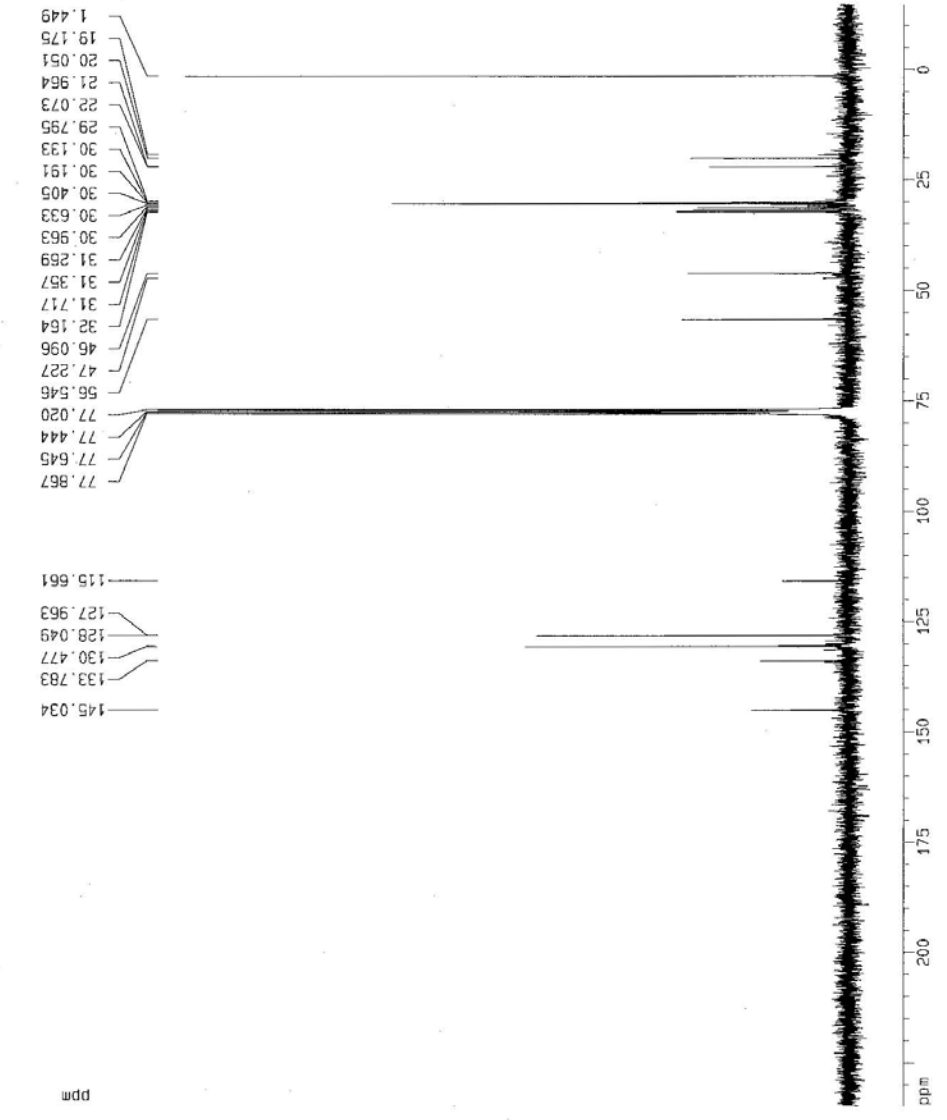

Supplement: NIHMS272045-supplement-4_si_004.pdf [file NIHMS272045-supplement-4_si_004.pdf]
